# Supplementary material for: Quinoline–sulfonamides as a multi-targeting neurotherapeutic for cognitive decline: in vitro , in silico studies and ADME evaluation of monoamine oxidases and cholinesterases inhibitors
Source: Royal Society of Chemistry journal article supplement (doi:10.1039/d3ra05501a), 2024-01-01
Supplement: d3ra05501a1.pdf [file d3ra05501a1.pdf]

## Quinoline-Sulfonamides as a Multi-targeting Neurotherapeutic for Cognitive Decline: In-vitro, In-silico studies and ADME evaluation of Monoamine Oxidases and Cholinesterases Inhibitors

Saquib Jalil<sup>1,2</sup>, Zahid hussain<sup>1</sup>, Syed Mobashir Ali Abid<sup>1,2</sup>, Abdul Hameed,<sup>4</sup> Jamshed Iqbal<sup>1,2,3</sup>

<sup>1</sup>Centre for Advanced Drug Research, Department of Pharmacy COMSATS University Islamabad, Abbottabad Campus, Abbottabad-22060, Pakistan

<sup>2</sup>Department of Pharmacy COMSATS University Islamabad, Abbottabad Campus, Abbottabad. 22060, Pakistan

<sup>3</sup>Department of Chemistry, COMSATS University Islamabad, Abbottabad Campus, Abbottabad 22060, Pakistan

<sup>4</sup>Department of Chemistry, University of Sahiwal, Sahiwal, 57000, Pakistan

### List of Figures

|                                                                   |    |
|-------------------------------------------------------------------|----|
| <b>Figure 1:</b> <sup>1</sup> HNMR of compound <b>a1</b> .....    | 4  |
| <b>Figure 2:</b> <sup>13</sup> CNMR of compound <b>a1</b> .....   | 5  |
| <b>Figure 3:</b> <sup>1</sup> HNMR of compound <b>a2</b> .....    | 5  |
| <b>Figure 4:</b> <sup>13</sup> CNMR of compound <b>a2</b> .....   | 6  |
| <b>Figure 5:</b> <sup>1</sup> HNMR of compound <b>a3</b> .....    | 6  |
| <b>Figure 6:</b> <sup>13</sup> CNMR of compound <b>a3</b> .....   | 7  |
| <b>Figure 7:</b> <sup>1</sup> HNMR of compound <b>a4</b> .....    | 7  |
| <b>Figure 8:</b> <sup>13</sup> CNMR of compound <b>a4</b> .....   | 8  |
| <b>Figure 9:</b> <sup>1</sup> HNMR of compound <b>a5</b> .....    | 9  |
| <b>Figure 10:</b> <sup>13</sup> CNMR of compound <b>a5</b> .....  | 9  |
| <b>Figure 11:</b> <sup>1</sup> HNMR of compound <b>a6</b> .....   | 10 |
| <b>Figure 12:</b> <sup>13</sup> CNMR of compound <b>a6</b> .....  | 10 |
| <b>Figure 13:</b> <sup>1</sup> HNMR of compound <b>a8</b> .....   | 11 |
| <b>Figure 14:</b> <sup>13</sup> CNMR of compound <b>a8</b> .....  | 11 |
| <b>Figure 15:</b> <sup>1</sup> NMR of compound <b>a9</b> .....    | 12 |
| <b>Figure 16:</b> <sup>13</sup> CNMR of compound <b>a9</b> .....  | 12 |
| <b>Figure 17:</b> <sup>1</sup> HNMR of compound <b>a10</b> .....  | 13 |
| <b>Figure 18:</b> <sup>13</sup> CNMR of compound <b>10</b> .....  | 13 |
| <b>Figure 19:</b> <sup>1</sup> HNMR of compound <b>a11</b> .....  | 14 |
| <b>Figure 20:</b> <sup>13</sup> CNMR of compound <b>a11</b> ..... | 14 |
| <b>Figure 21:</b> <sup>1</sup> HNMR of compound <b>a12</b> .....  | 15 |

|                                                                    |    |
|--------------------------------------------------------------------|----|
| <b>Figure 22:</b> $^{13}\text{C}$ NMR of compound <b>a12</b> ..... | 15 |
| <b>Figure 23:</b> $^1\text{H}$ NMR of compound <b>a14</b> .....    | 16 |
| <b>Figure 24:</b> $^{13}\text{C}$ NMR of compound <b>a14</b> ..... | 16 |
| <b>Figure 25:</b> $^1\text{H}$ NMR of compound <b>a15</b> .....    | 17 |
| <b>Figure 26:</b> $^{13}\text{C}$ NMR of compound <b>a15</b> ..... | 18 |
| <b>Figure 27:</b> $^1\text{H}$ NMR of compound <b>a16</b> .....    | 18 |
| <b>Figure 28:</b> $^{13}\text{C}$ NMR of compound <b>a16</b> ..... | 19 |
| <b>Figure 29:</b> $^1\text{H}$ NMR of compound <b>a17</b> .....    | 20 |
| <b>Figure 30:</b> $^{13}\text{C}$ NMR of compound <b>a17</b> ..... | 20 |
| <b>Figure 31:</b> $^1\text{H}$ NMR of compound <b>a18</b> .....    | 21 |
| <b>Figure 32:</b> $^{13}\text{C}$ NMR of compound <b>a18</b> ..... | 21 |
| <b>Figure 33:</b> FTIR graph of compound <b>a1</b> .....           | 22 |
| <b>Figure 34:</b> FTIR graph of compound <b>a2</b> .....           | 22 |
| <b>Figure 35:</b> FTIR graph of compound <b>a3</b> .....           | 23 |
| <b>Figure 36:</b> FTIR graph of compound <b>a4</b> .....           | 23 |
| <b>Figure 37:</b> FTIR graph of compound <b>a5</b> .....           | 24 |
| <b>Figure 38:</b> FTIR graph of compound <b>a6</b> .....           | 24 |
| <b>Figure 39:</b> FTIR graph of compound <b>a7</b> .....           | 25 |
| <b>Figure 40:</b> FTIR graph of compound <b>a8</b> .....           | 25 |
| <b>Figure 41:</b> FTIR graph of compound <b>a9</b> .....           | 26 |
| <b>Figure 42:</b> FTIR graph of compound <b>a10</b> .....          | 26 |
| <b>Figure 43:</b> FTIR graph of compound <b>a11</b> .....          | 27 |
| <b>Figure 44:</b> FTIR graph of compound <b>a12</b> .....          | 28 |
| <b>Figure 45:</b> FTIR graph of compound <b>a13</b> .....          | 28 |
| <b>Figure 46:</b> FTIR graph of compound <b>a14</b> .....          | 29 |
| <b>Figure 47:</b> FTIR graph of compound <b>a15</b> .....          | 29 |
| <b>Figure 48:</b> FTIR graph of compound <b>a16</b> .....          | 30 |
| <b>Figure 49:</b> FTIR graph of compound <b>a17</b> .....          | 30 |
| <b>Figure 50:</b> FTIR graph of compound <b>a18</b> .....          | 31 |
| <b>Figure 51:</b> Chromatogram of compound <b>a5</b> .....         | 32 |
| <b>Figure 52:</b> Chromatogram of compound <b>a3</b> .....         | 33 |
| <b>Figure 53:</b> Chromatogram of compound <b>a4</b> .....         | 34 |

|                                                                                                                     |    |
|---------------------------------------------------------------------------------------------------------------------|----|
| <b>Figure 54:</b> 2d interaction of compound <b>a5</b> left side MAO-A (a) and <b>a12</b> right side MAO-B (b)..... | 45 |
| <b>Figure 55:</b> 2d interaction of compound <b>a11</b> left side AChE (c) and <b>a6</b> right side BChE (d).....   | 45 |

### **List of Tables**

|                                                                                                  |    |
|--------------------------------------------------------------------------------------------------|----|
| <b>Table 1:</b> The docking scores of synthesized compounds on MAO-A, MAO-B, AChE, and BChE..... | 34 |
| <b>Table 2:</b> IC <sub>50</sub> values of synthesized compounds against monoamine oxidase.....  | 35 |
| <b>Table 3:</b> IC <sub>50</sub> values of synthesized compounds against AChE and BChE .....     | 39 |

## Supporting Information

### 1.1 $^1\text{H}$ NMR, $^{13}\text{C}$ NMR Spectra of the synthesized compounds

#### Compound a1

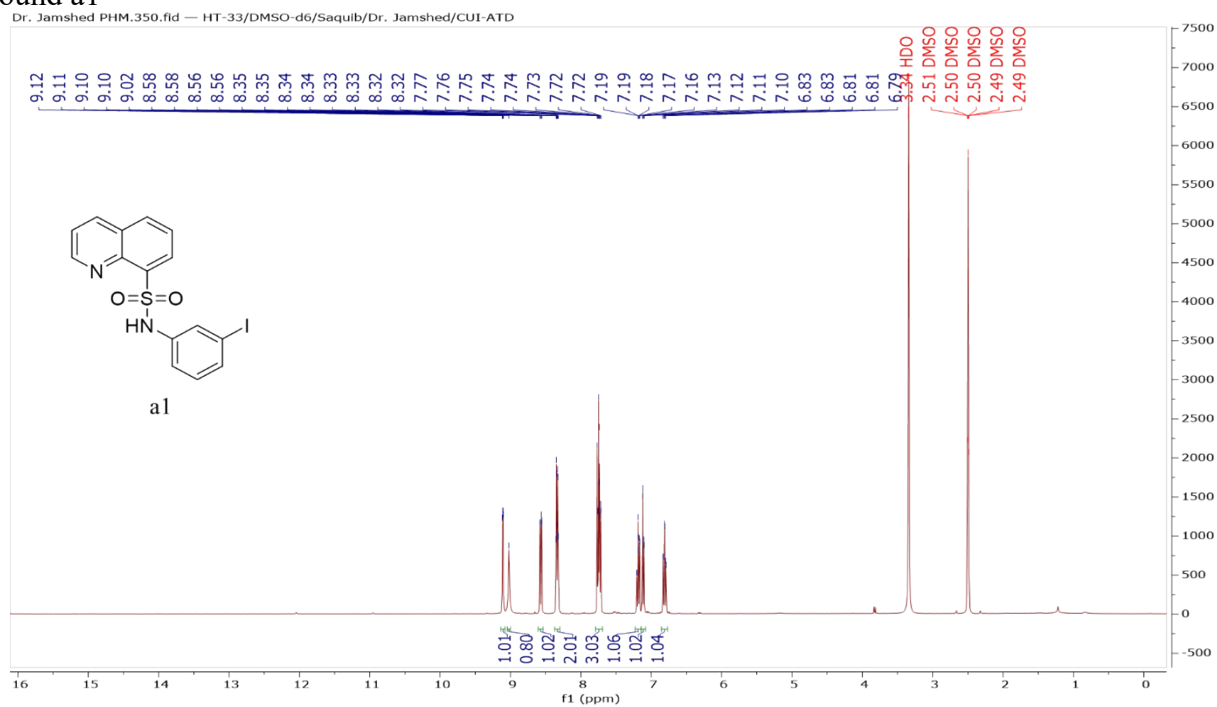

Figure 1:  $^1\text{H}$ NMR of compound a1

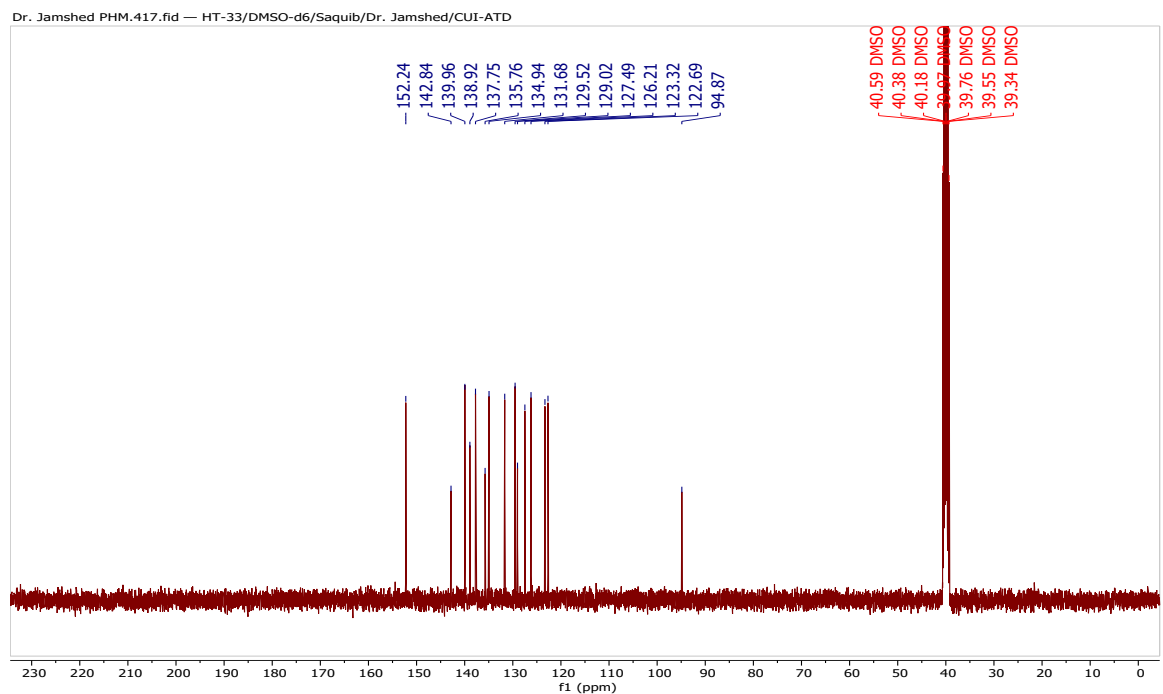

Figure 2:  $^{13}\text{C}$ NMR of compound a1

# Compound a2

Dr. Jamshed PHM.351.fid — HT-34/DMSO-d6/Saqib/Dr. Jamshed/CUI-ATD

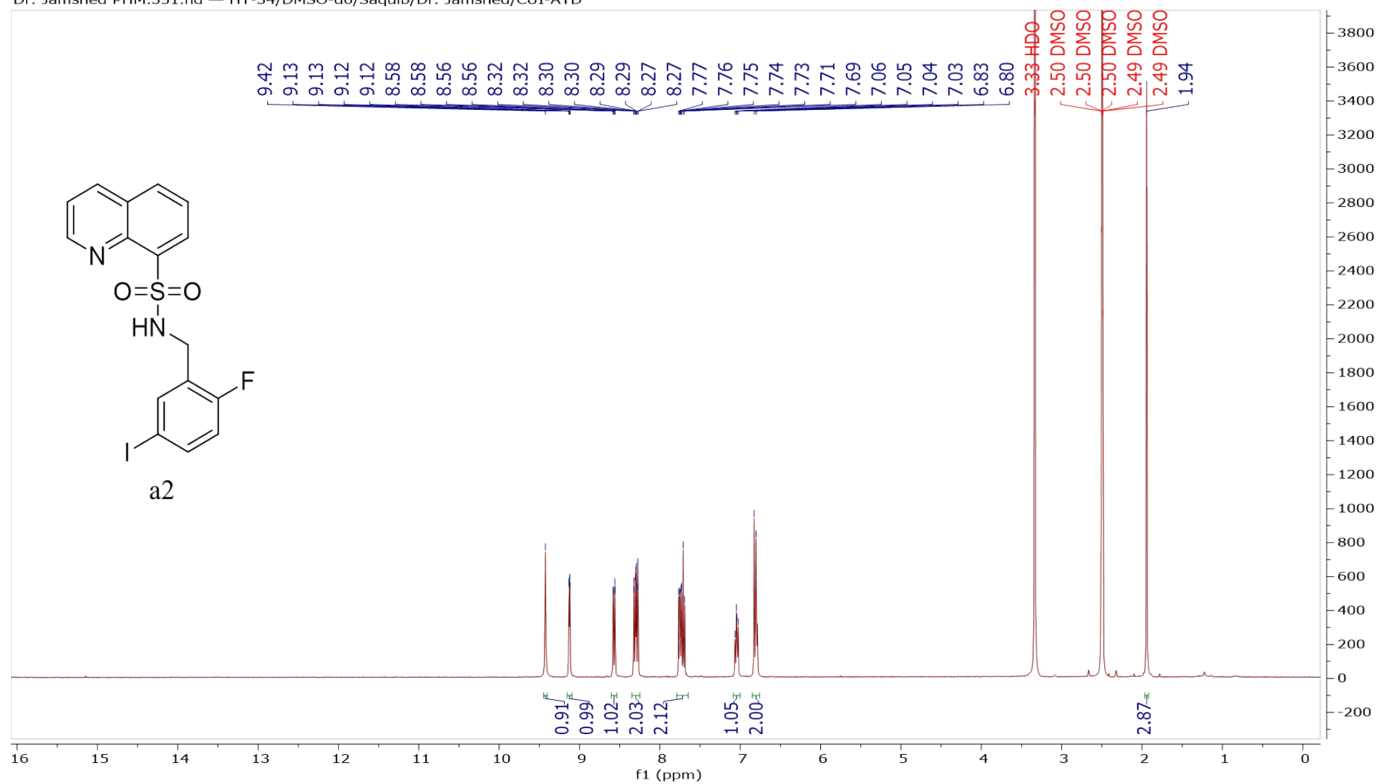

Figure 3: <sup>1</sup>H NMR of compound a2

Dr. Jamshed PHM.418.fid — HT-34/DMSO-d6/Saqib/Dr. Jamshed/CUI-ATD

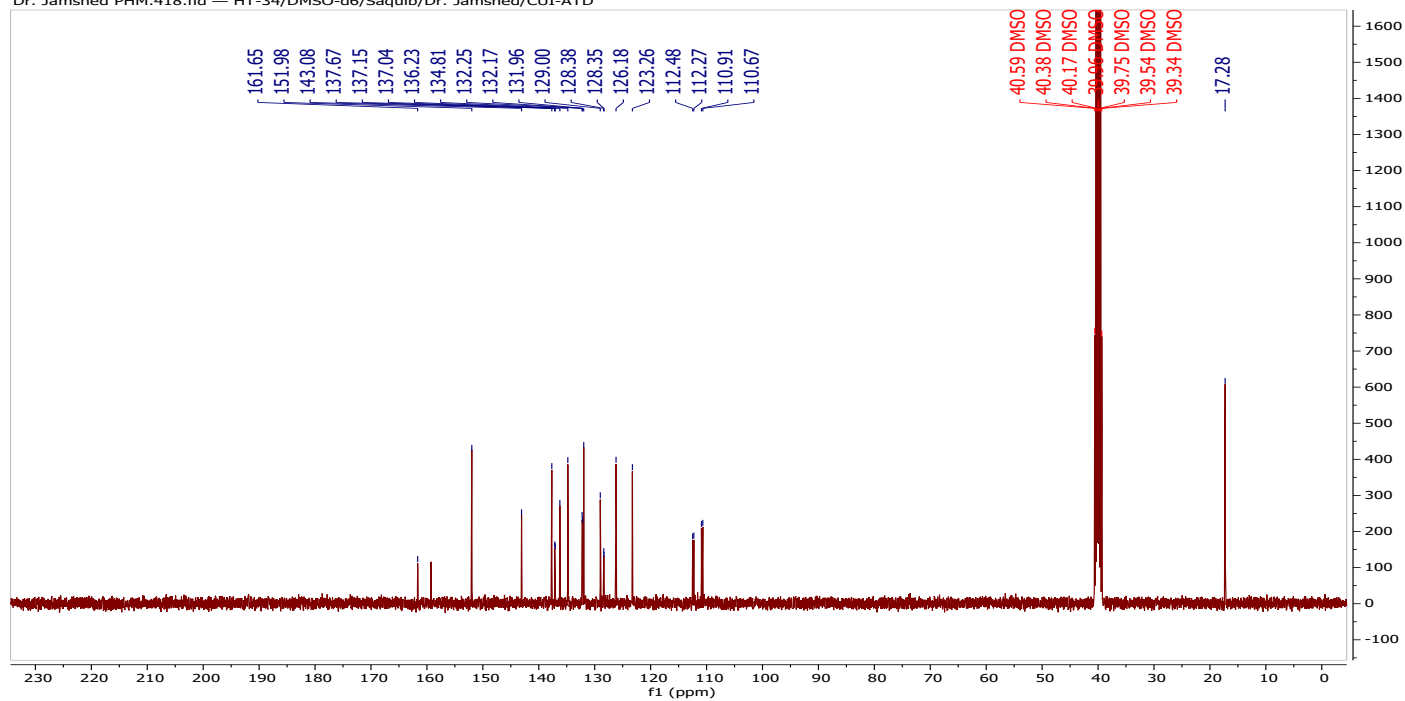

Figure 4: <sup>13</sup>C NMR of compound a2

# Compound a3

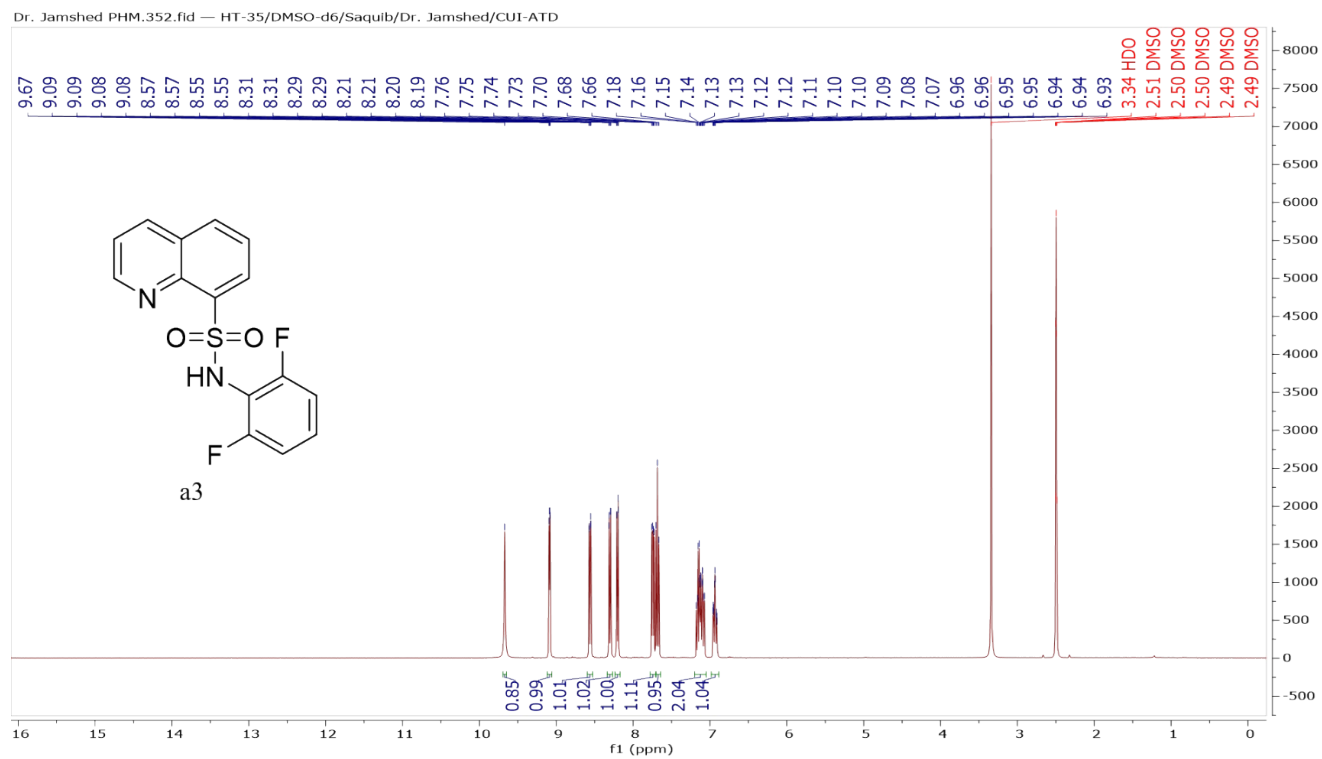

Figure 5: <sup>1</sup>H NMR of compound a3

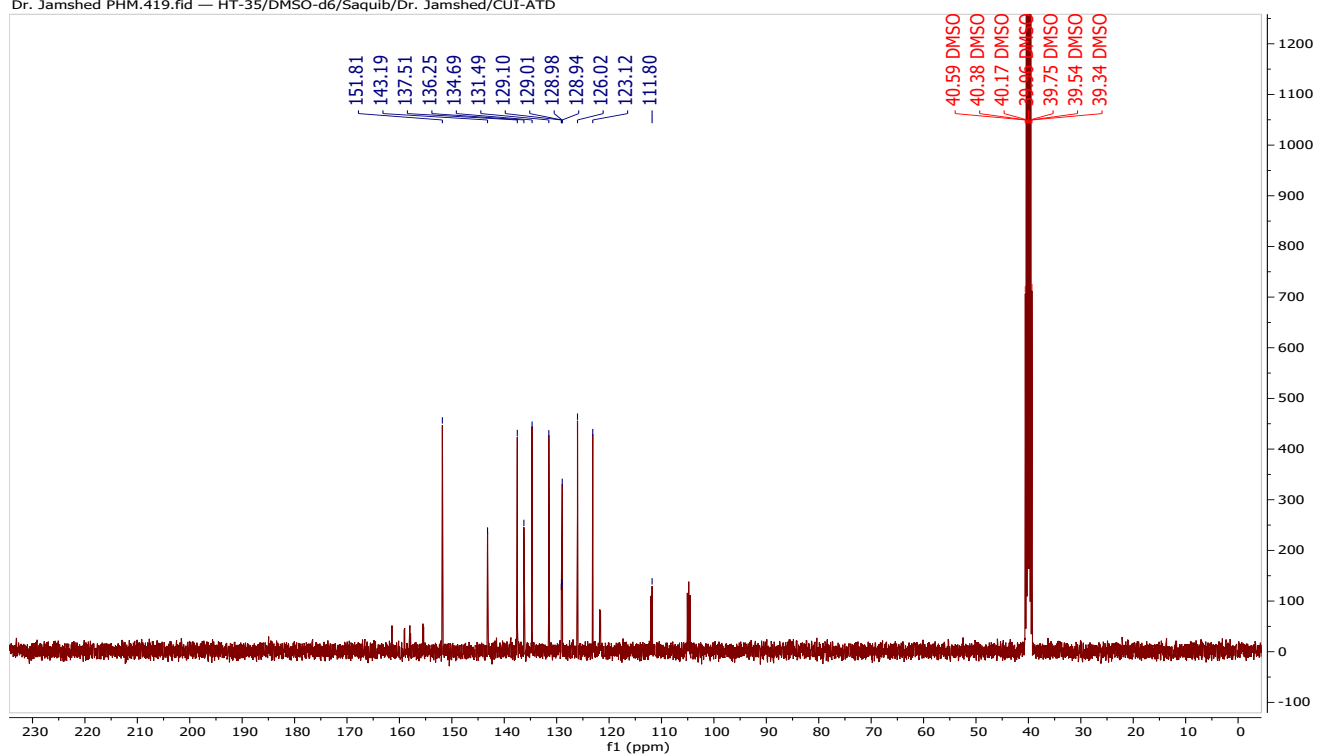

Figure 6: <sup>13</sup>CNMR of compound a3

Compound a4

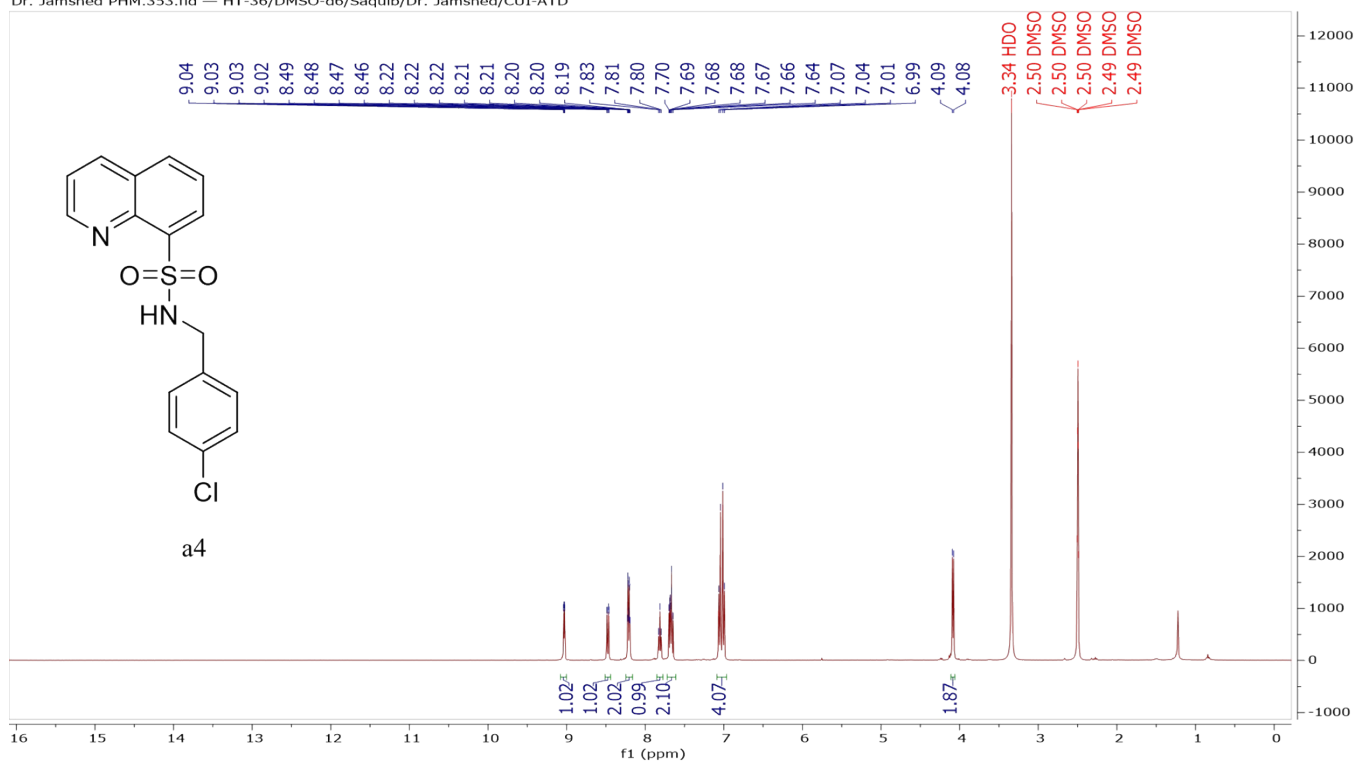

Figure 7: <sup>1</sup>HNMR of compound a4

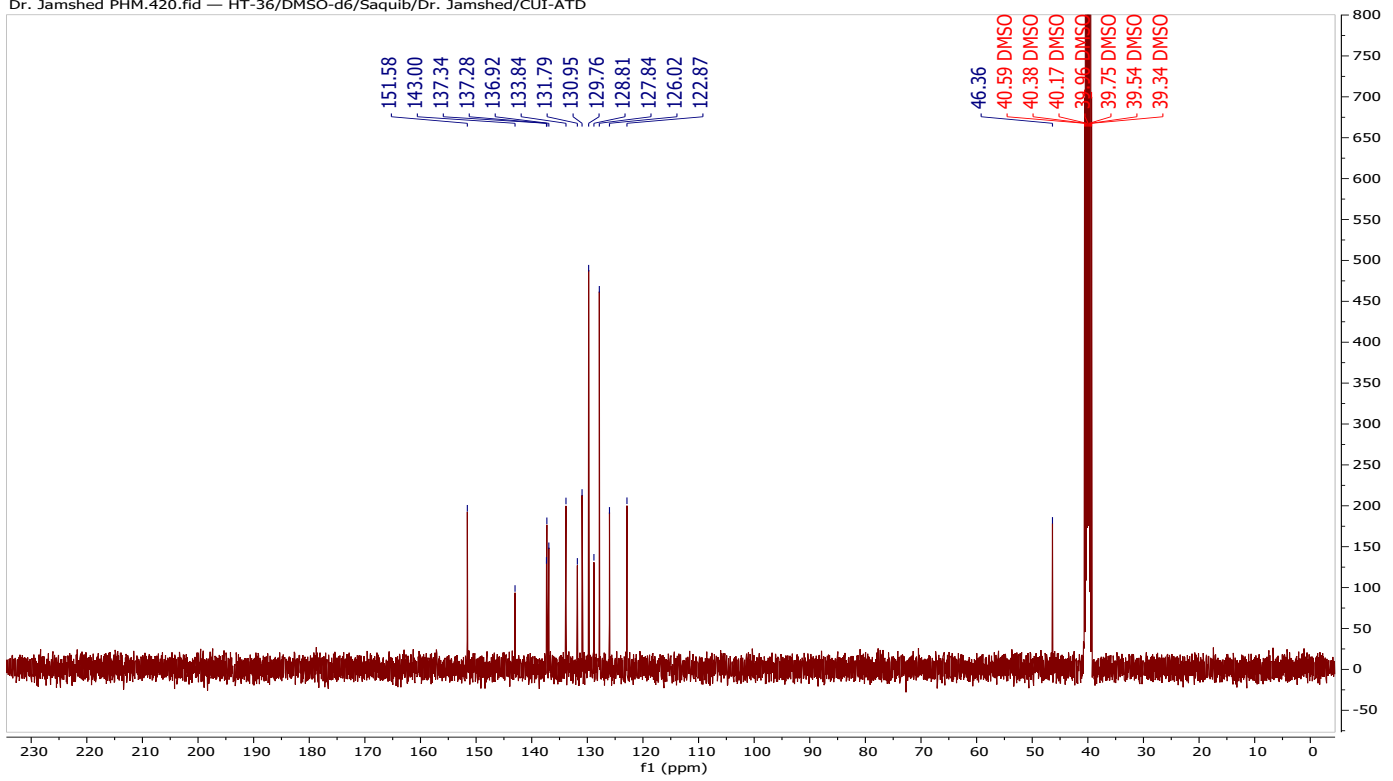

Figure 8: <sup>13</sup>CNMR of compound a4

Compound a5



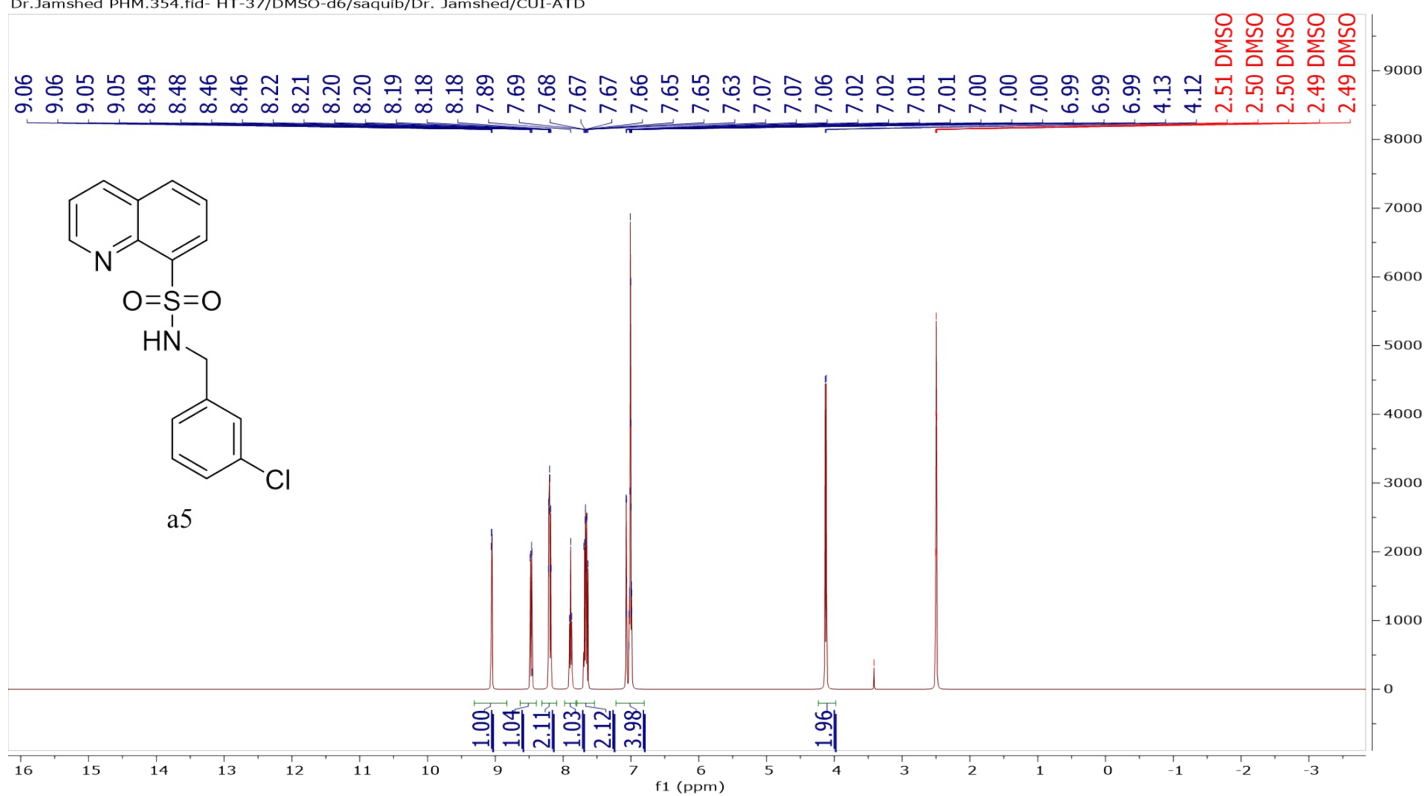

Figure 9: <sup>1</sup>H NMR of compound a5

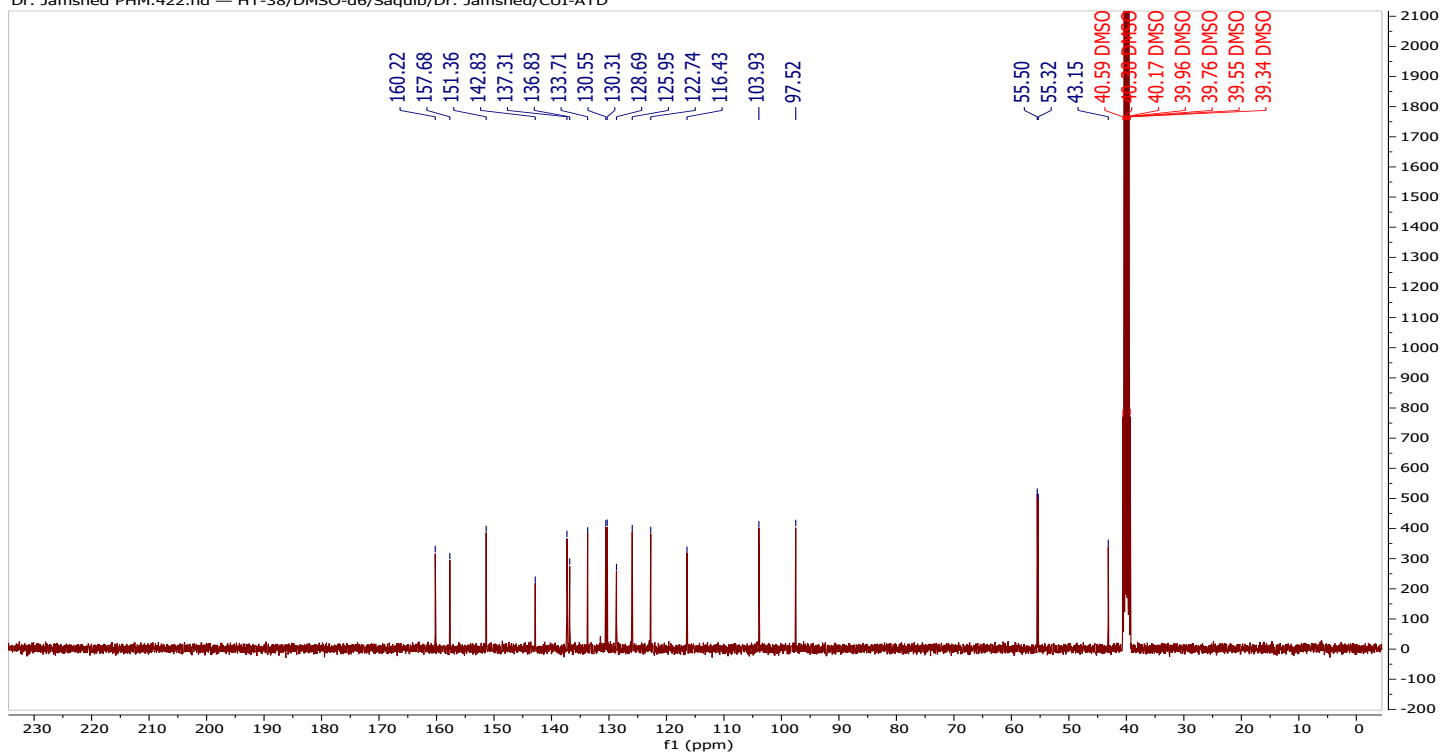

Figure 10: <sup>13</sup>C NMR of compound a5

# Compound a6

Dr. Jamshed PHM.355.fid- HT-38/DMSO-d6/Saqib/Dr. Jamshed/CUI-ATD

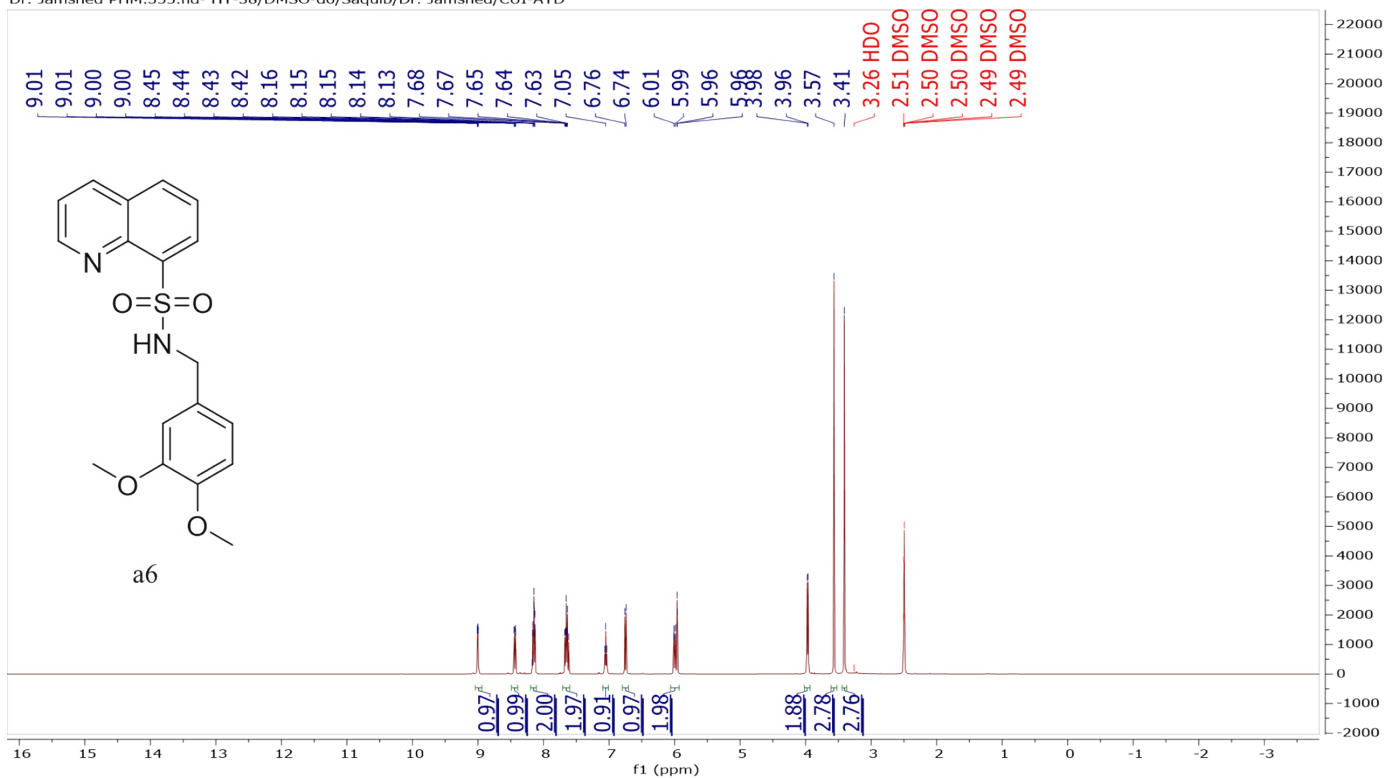

Figure 11: <sup>1</sup>H NMR of compound a6

Dr. Jamshed PHM.422.fid — HT-38/DMSO-d6/Saqib/Dr. Jamshed/CUI-ATD

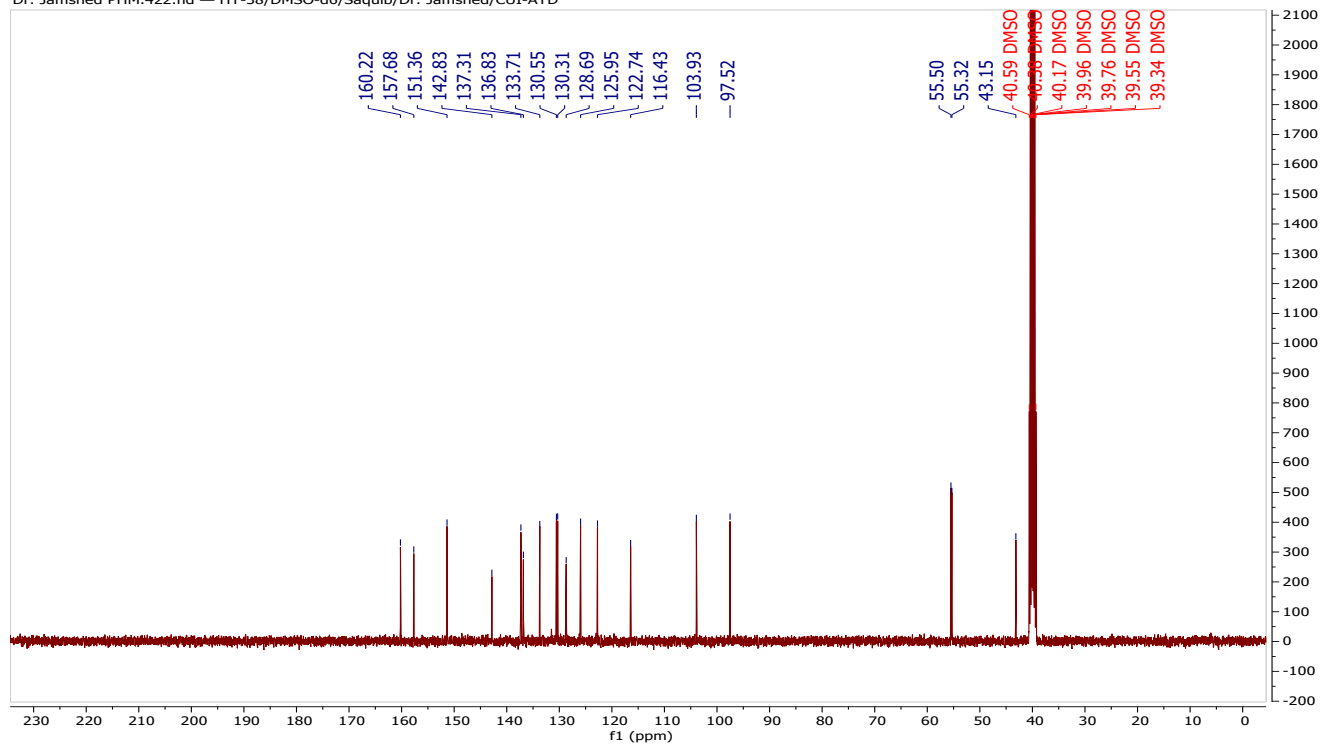

Figure 12: <sup>13</sup>C NMR of compound a6

# Compound a8

Dr. Jamshed PHM.443.fid — HT-42/DMSO-d6/Saqib/Dr. Jamshed Iqbal/CUI-ATD

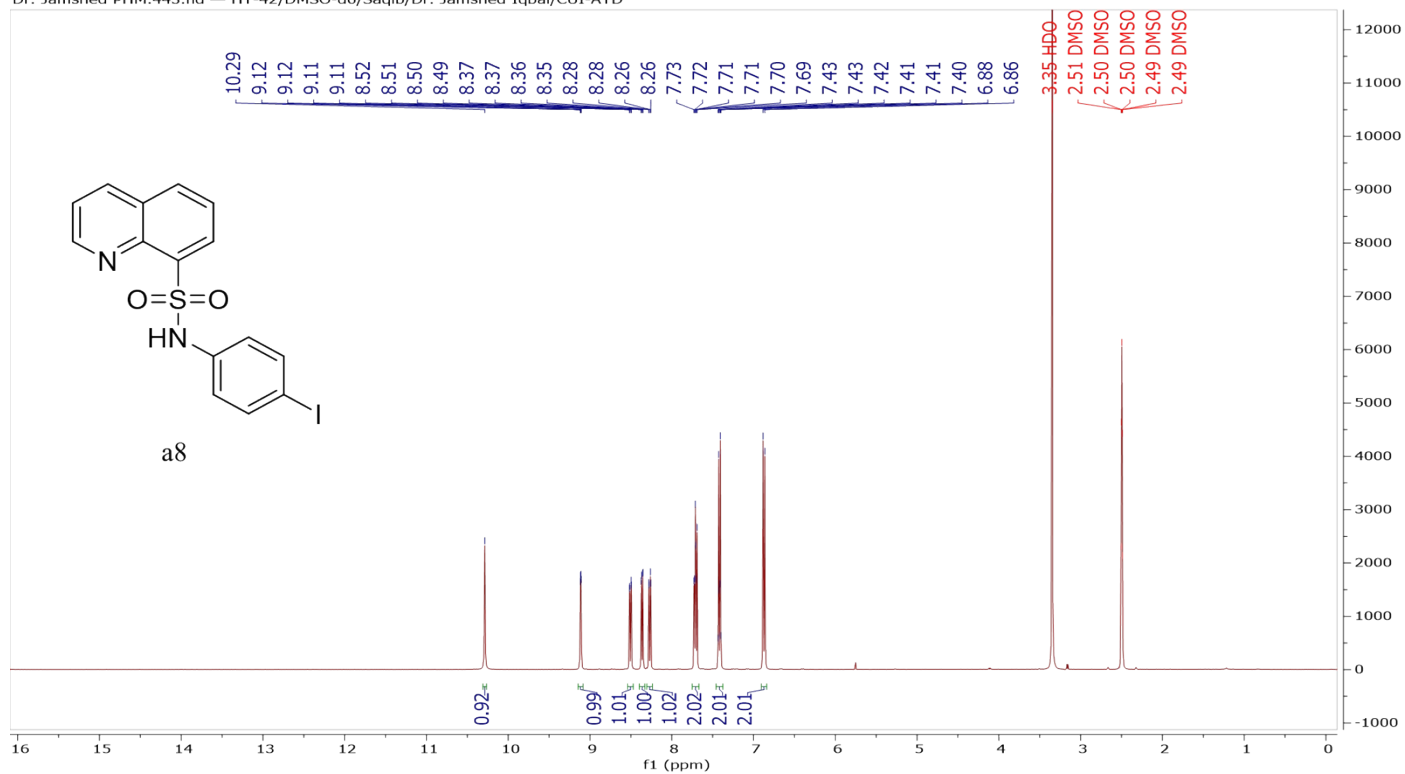

Figure 13: <sup>1</sup>H NMR of compound a8

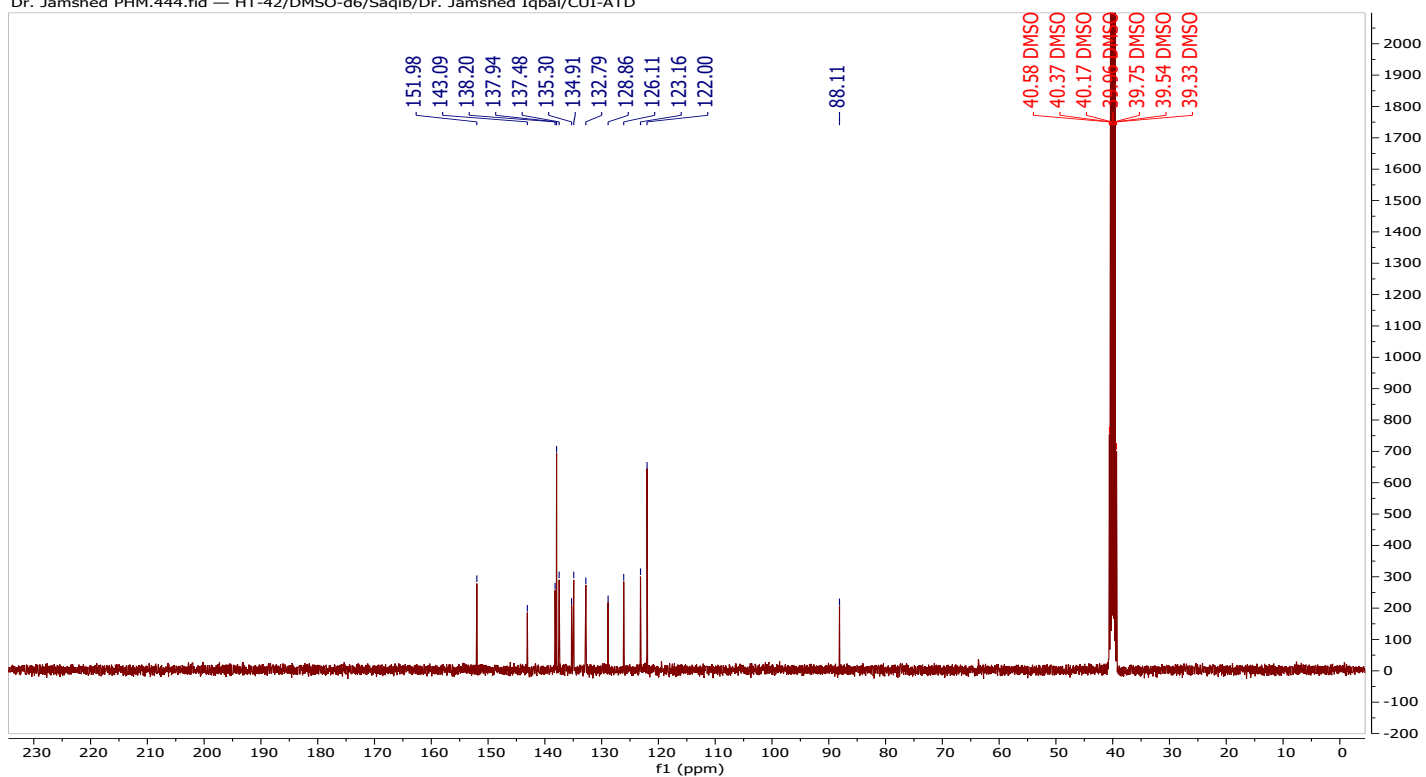

Figure 14:  $^{13}\text{C}$ NMR of compound a8

### Compound a9

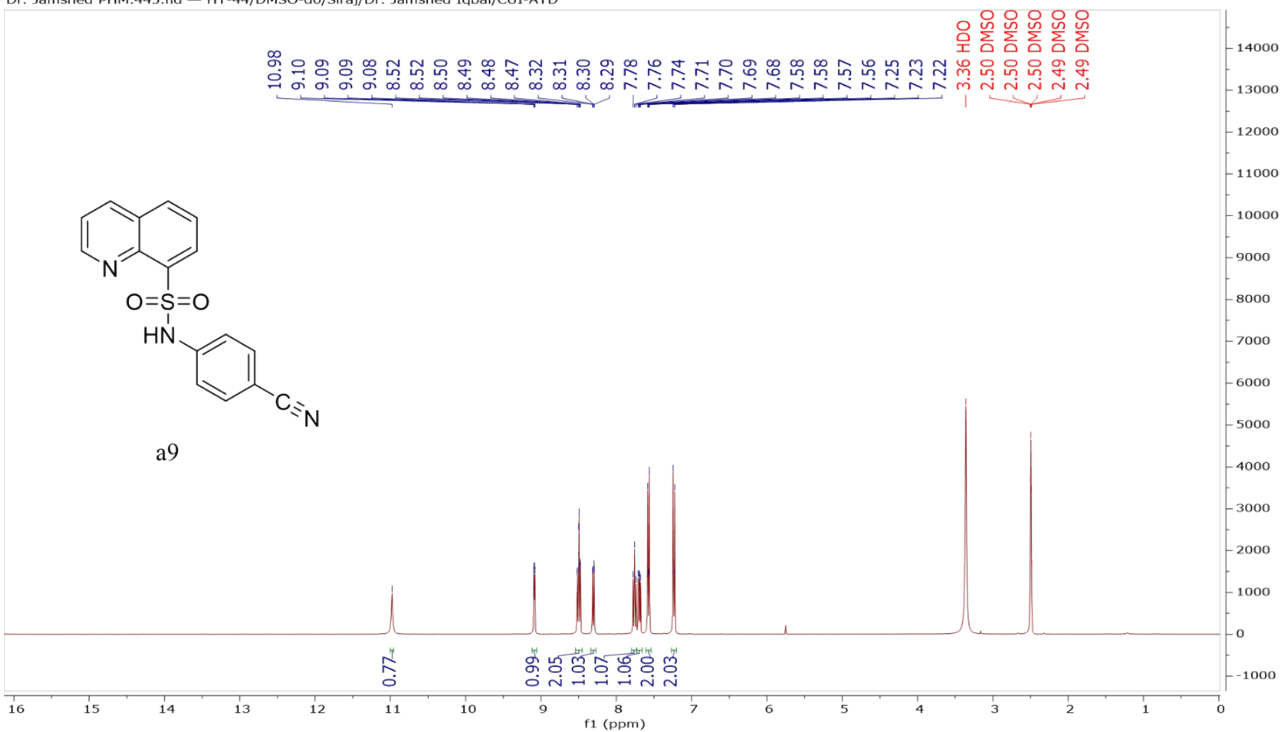

Figure 15:  $^1\text{H}$ NMR of compound a9

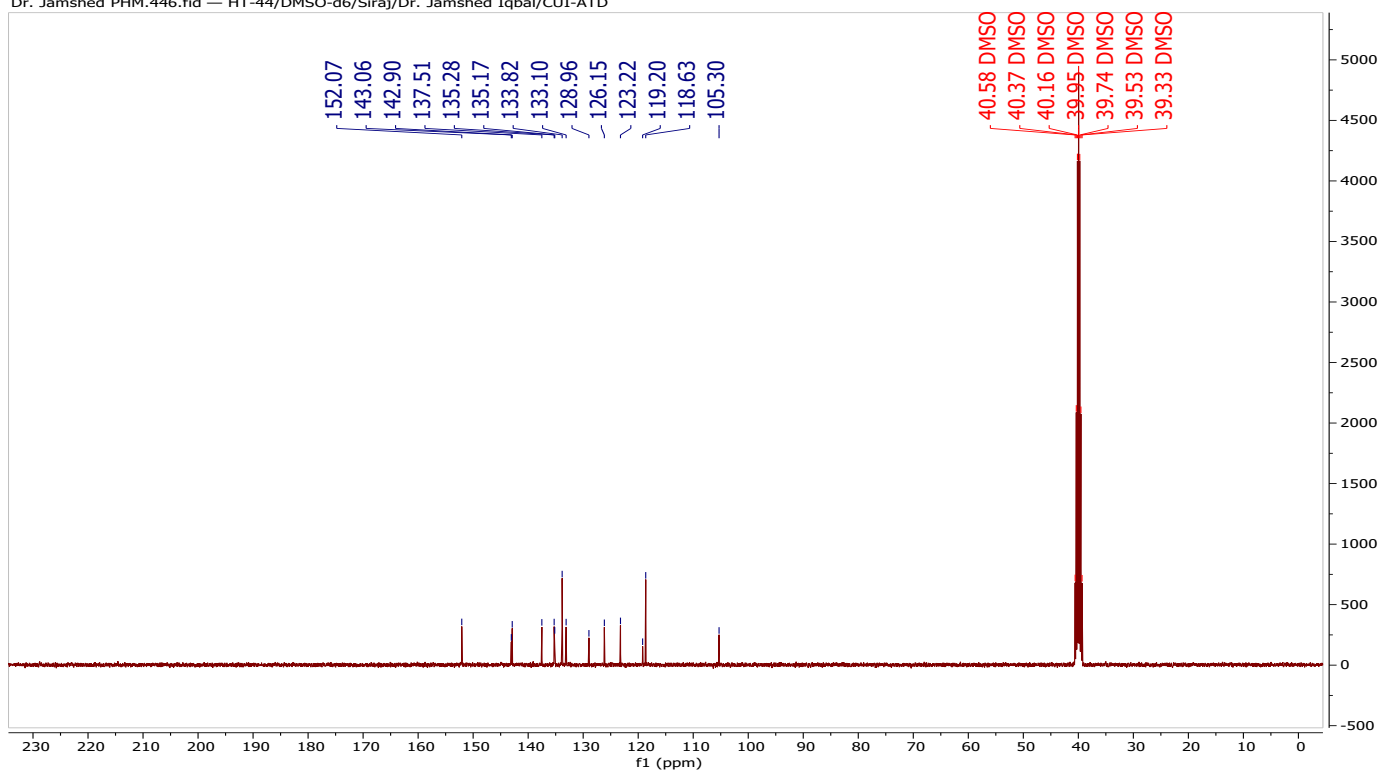

Figure 16:  $^{13}\text{C}$ NMR of compound a9

Compound a10

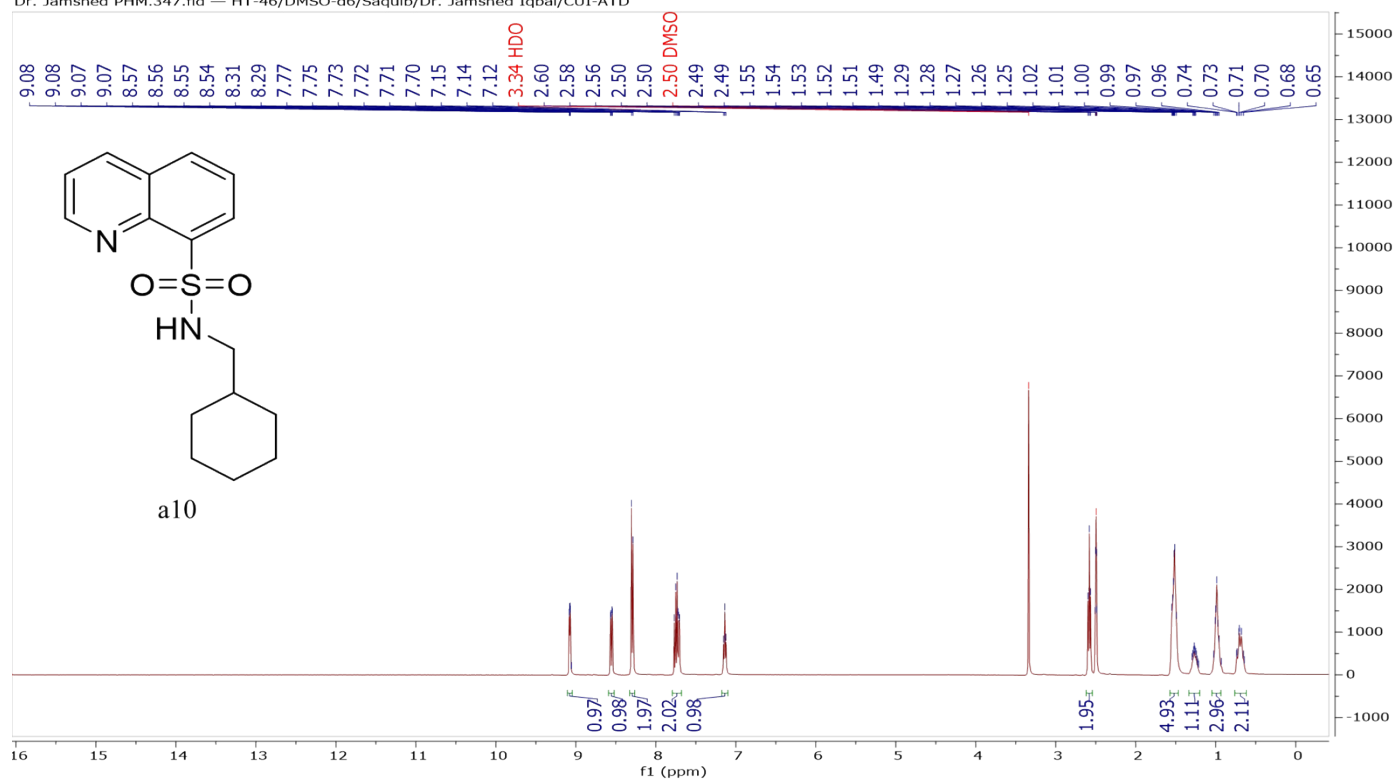

Figure 17: <sup>1</sup>H NMR of compound a10

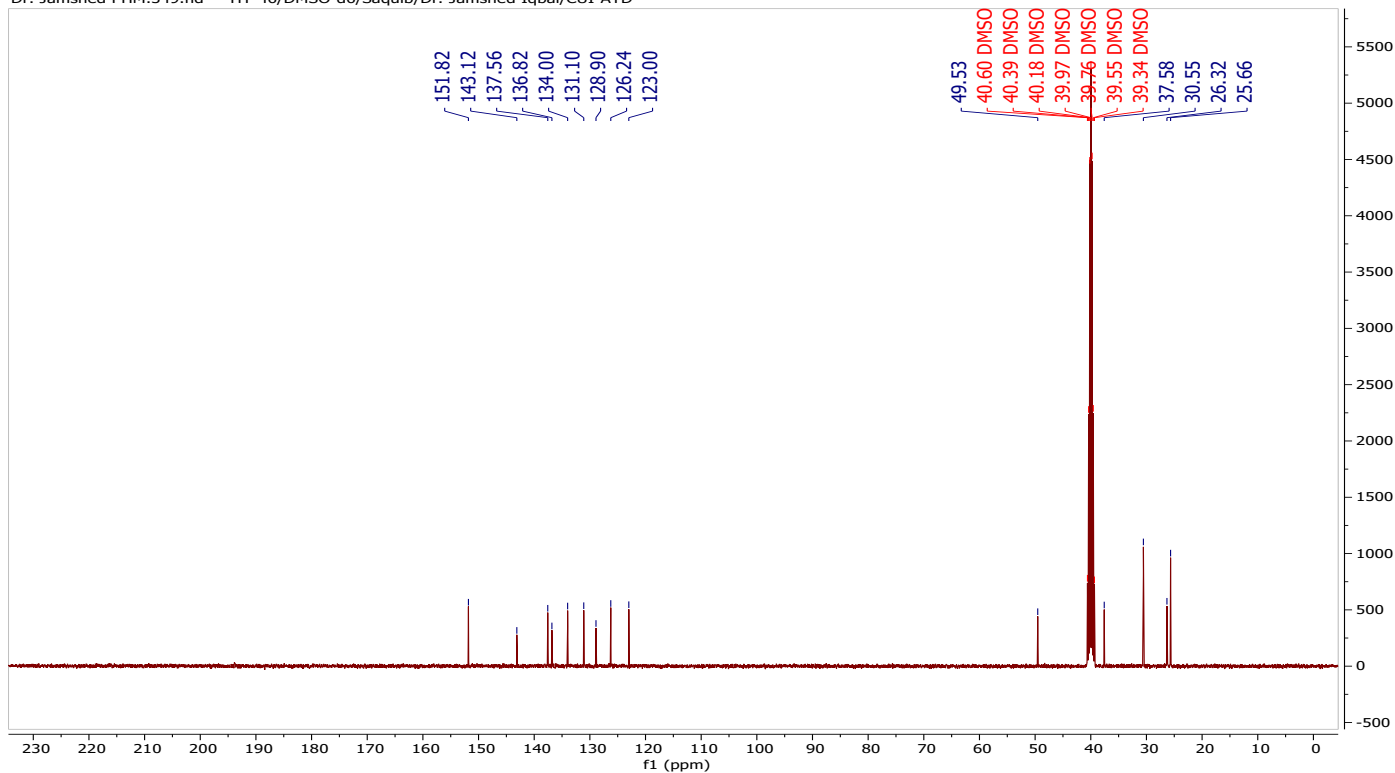

Figure 18: <sup>13</sup>C NMR of compound 10

# Compound a11

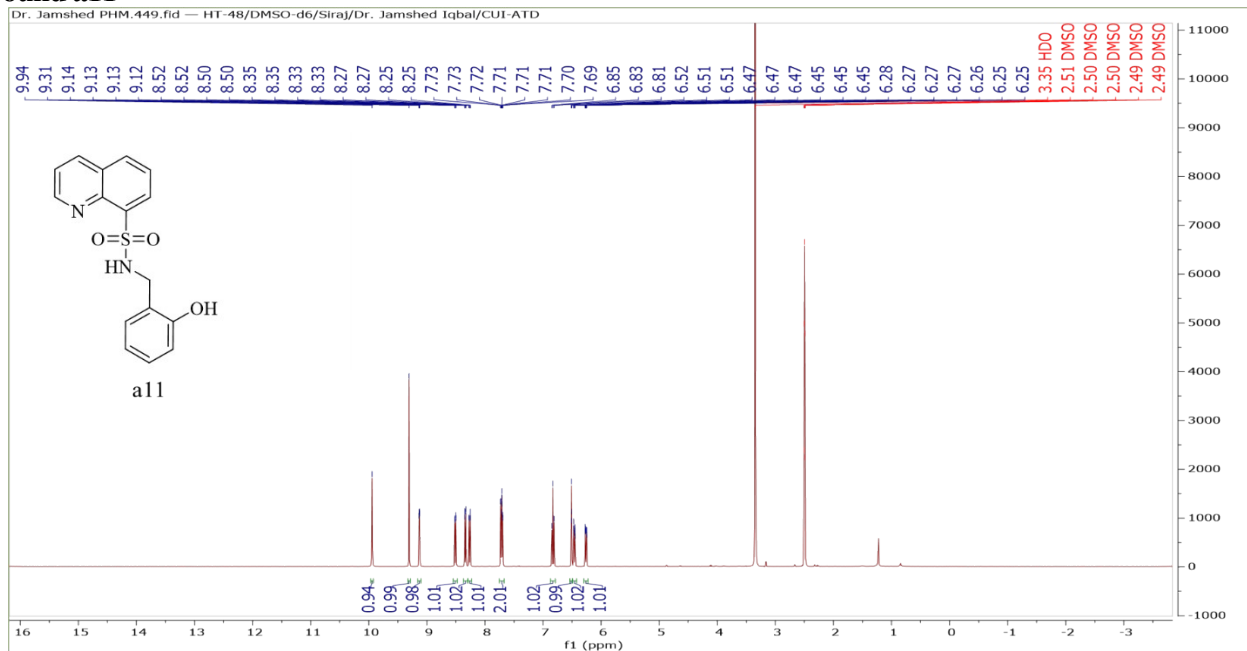

80

Figure 19: <sup>1</sup>H NMR of compound a11

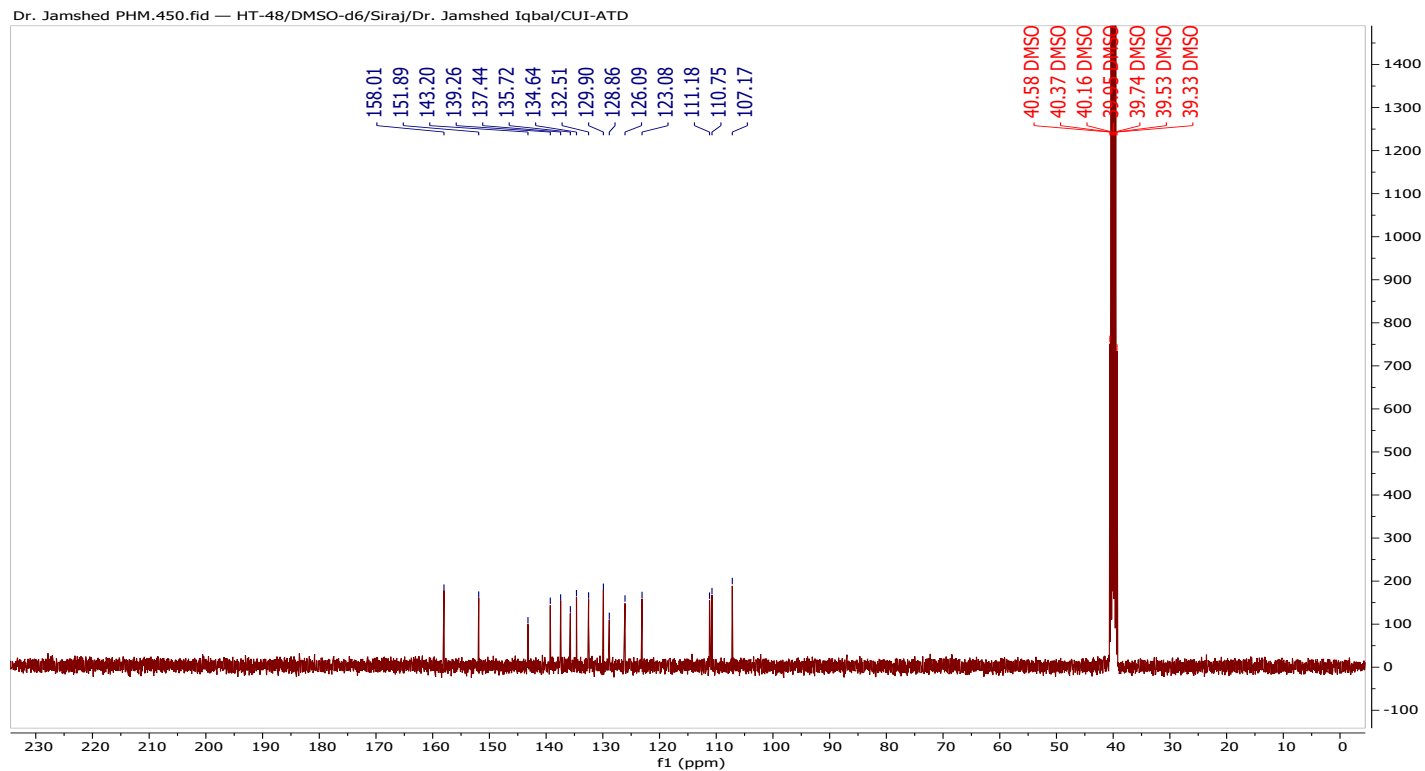

Figure 20: <sup>13</sup>C NMR of compound a11

# Compound a12

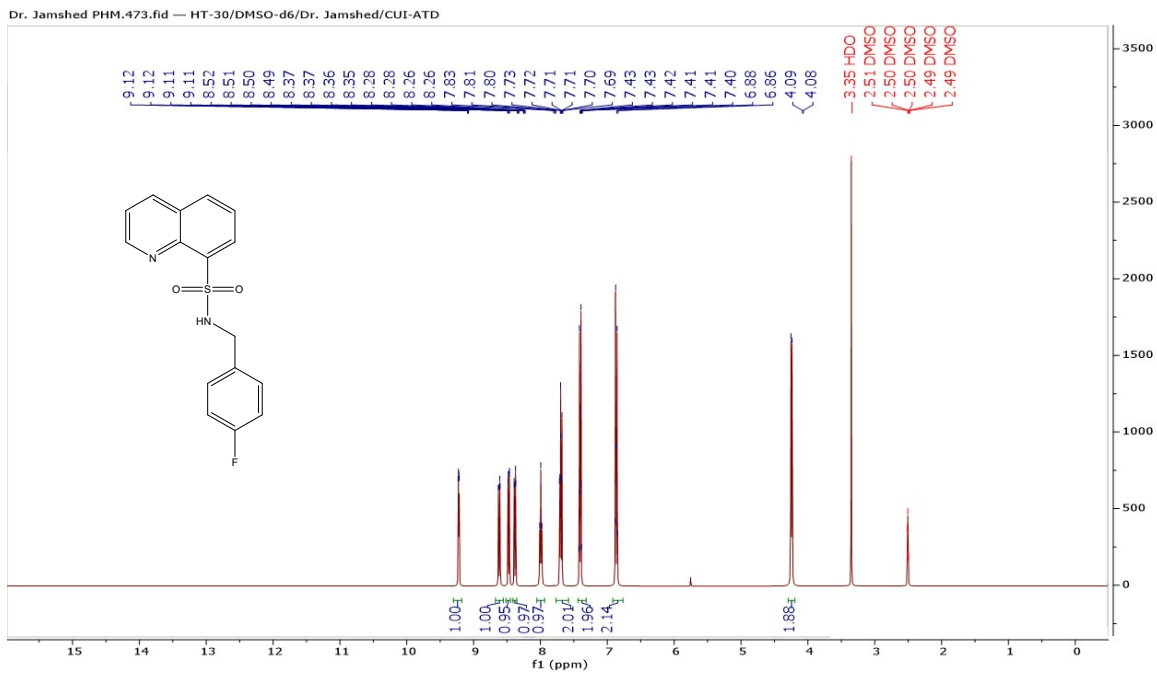

Figure 21:  $^1\text{H}$ NMR of compound a12

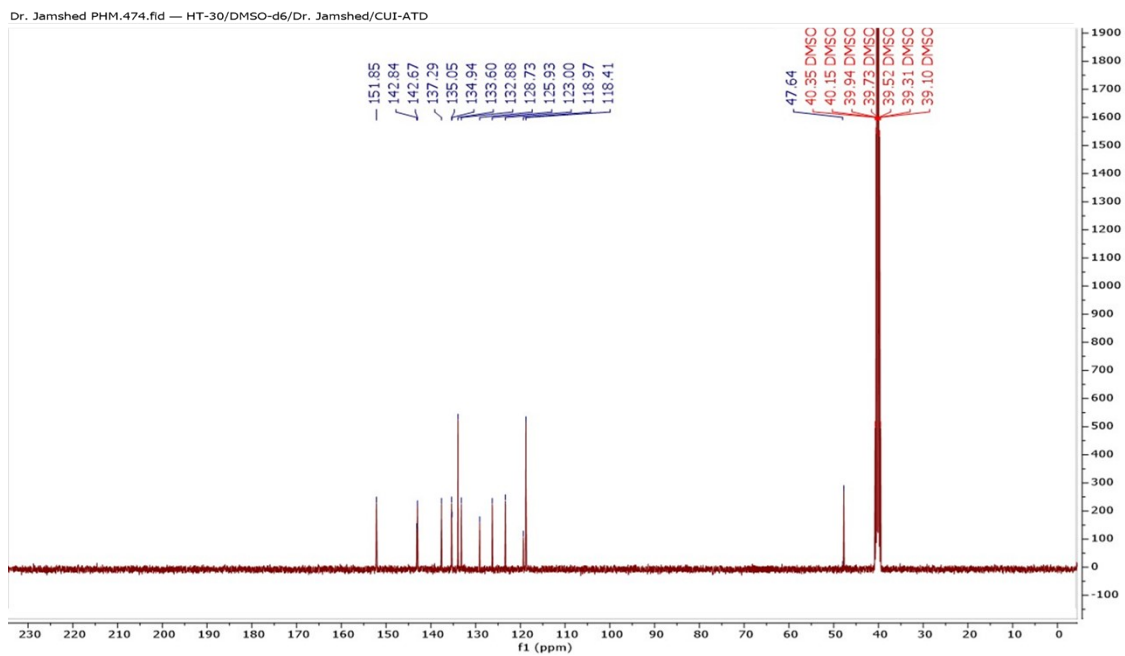

Figure 22:  $^{13}\text{C}$ NMR of compound a12



# Compound a14

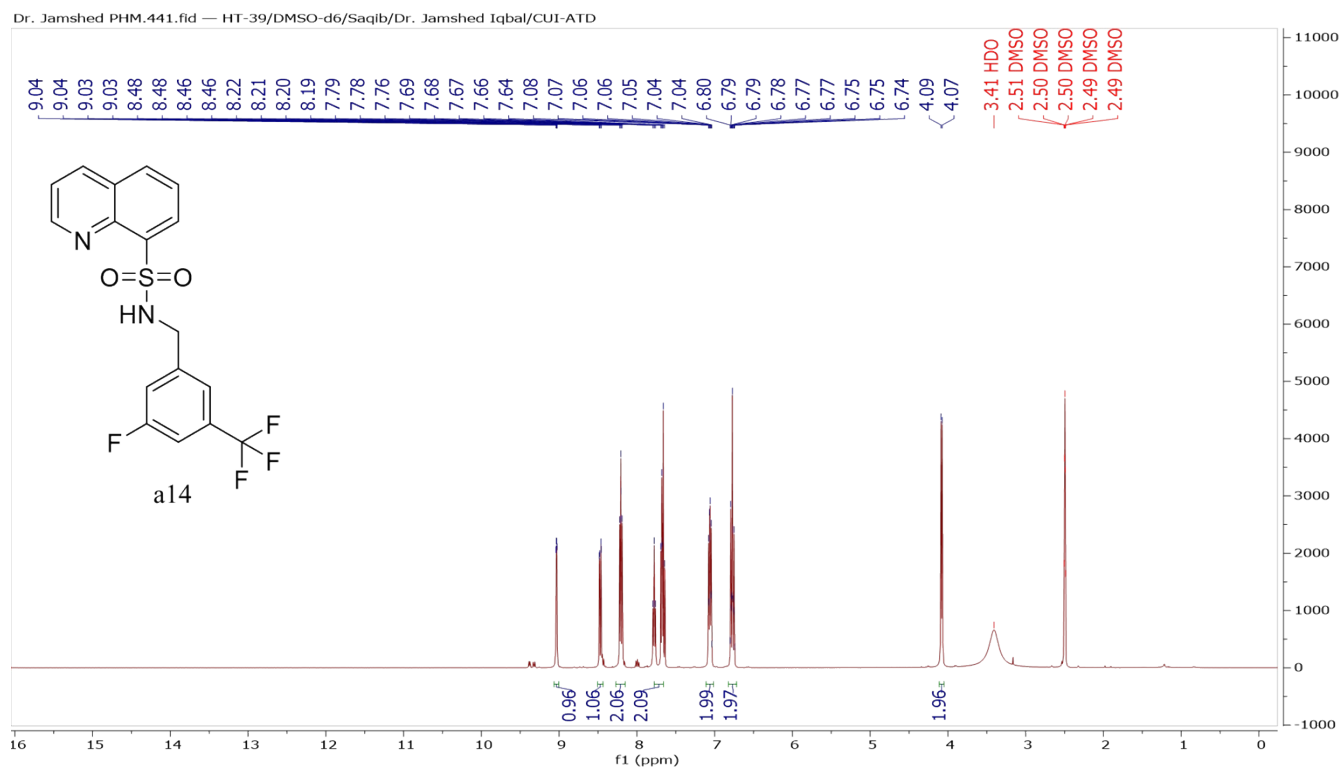

Figure 23: <sup>1</sup>H NMR of compound a14

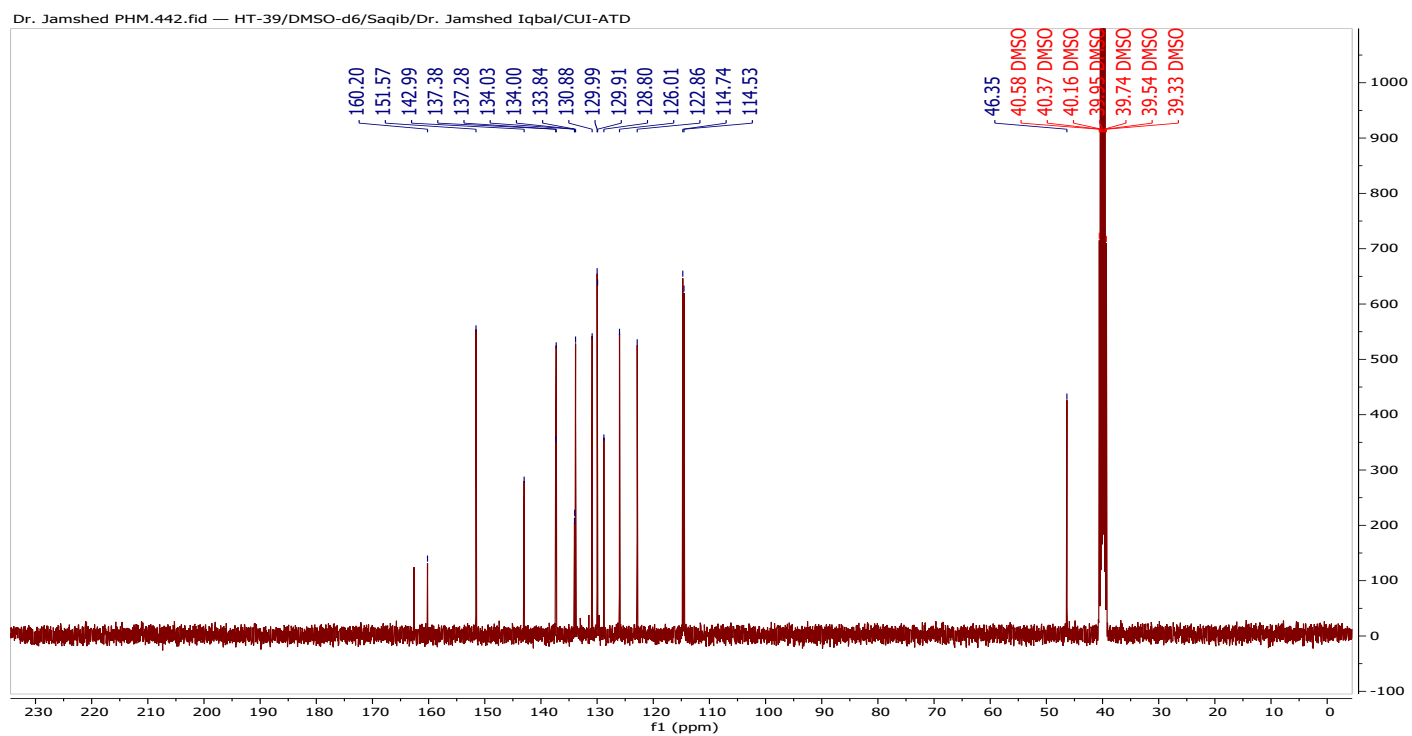

Figure 24: <sup>13</sup>C NMR of compound a14

# Compound a15

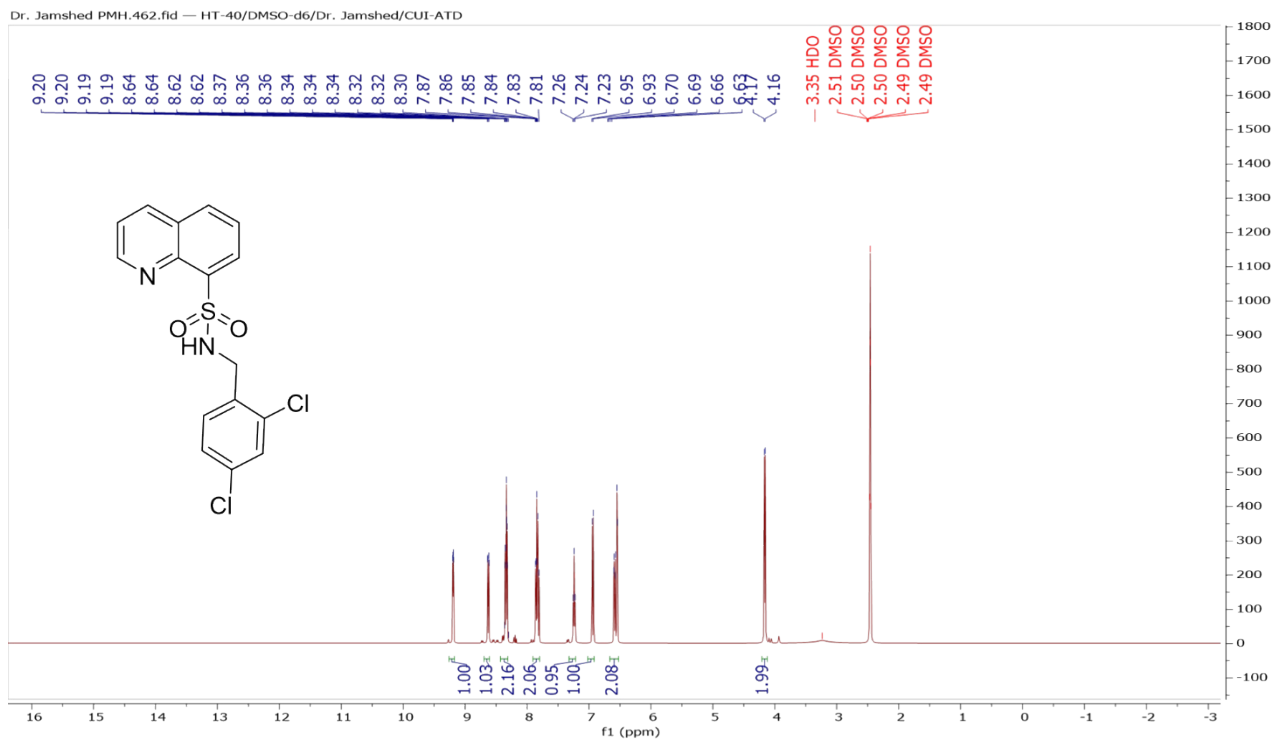

Figure 25: <sup>1</sup>H NMR of compound a15

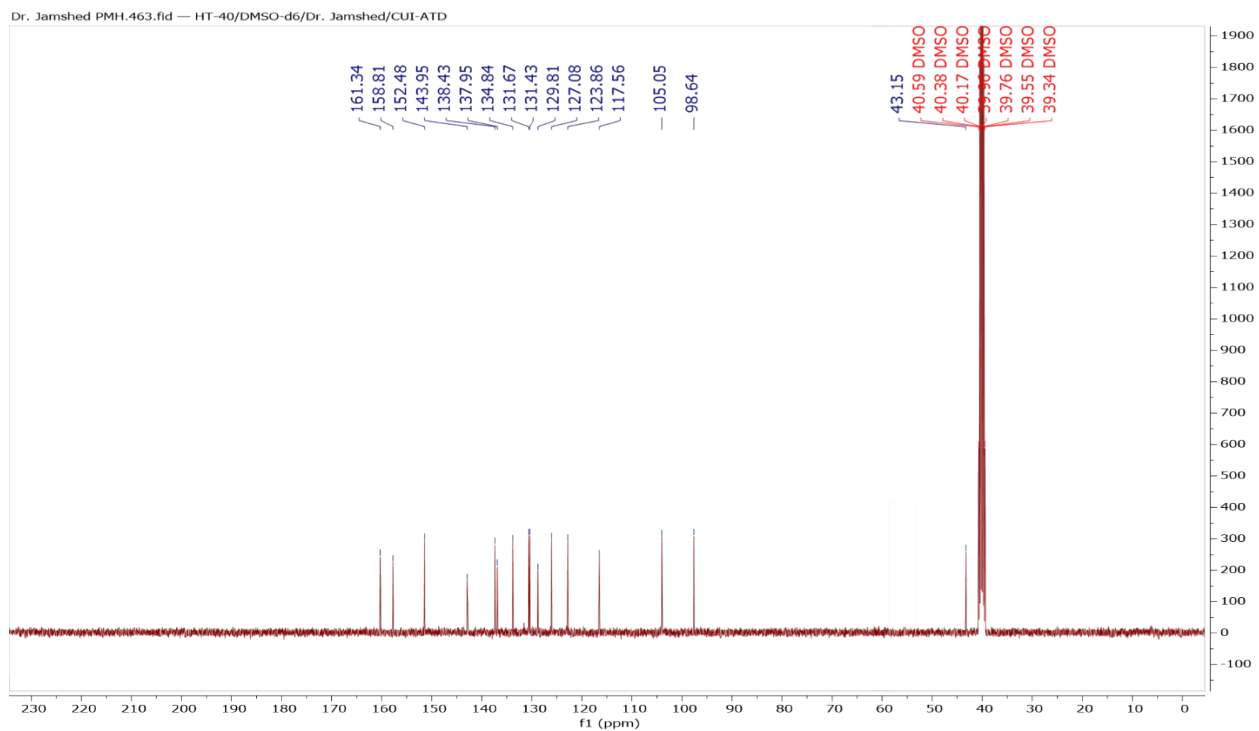

Figure 26:  $^{13}\text{C}$ NMR of compound a15

Compound a16

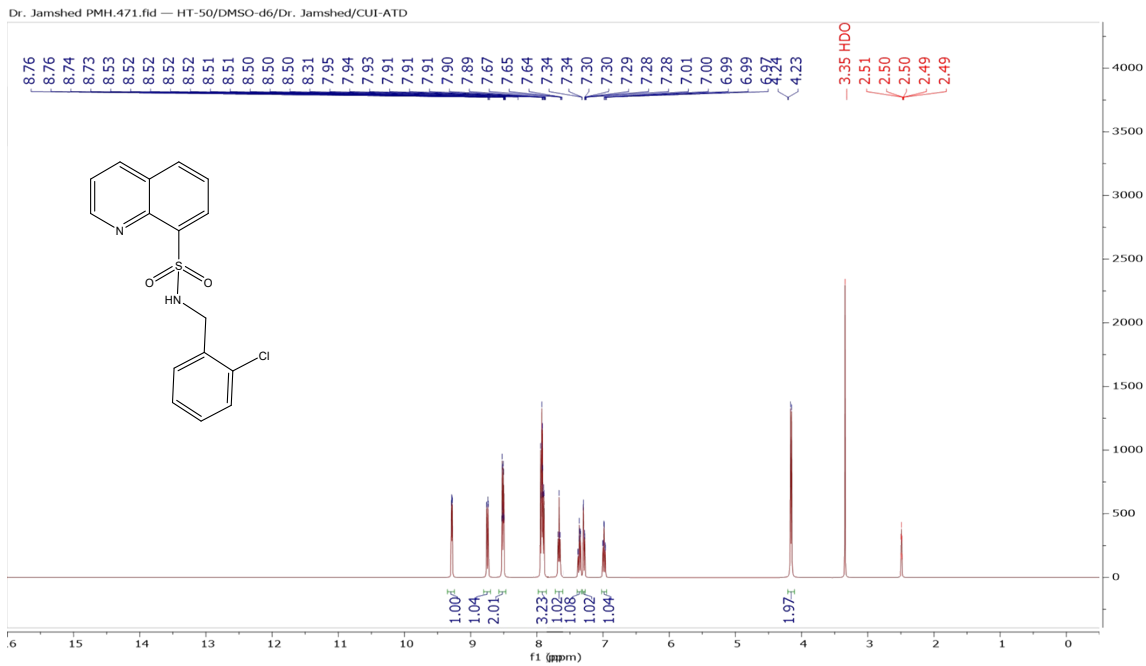

Figure 27:  $^1\text{H}$ NMR of compound a16

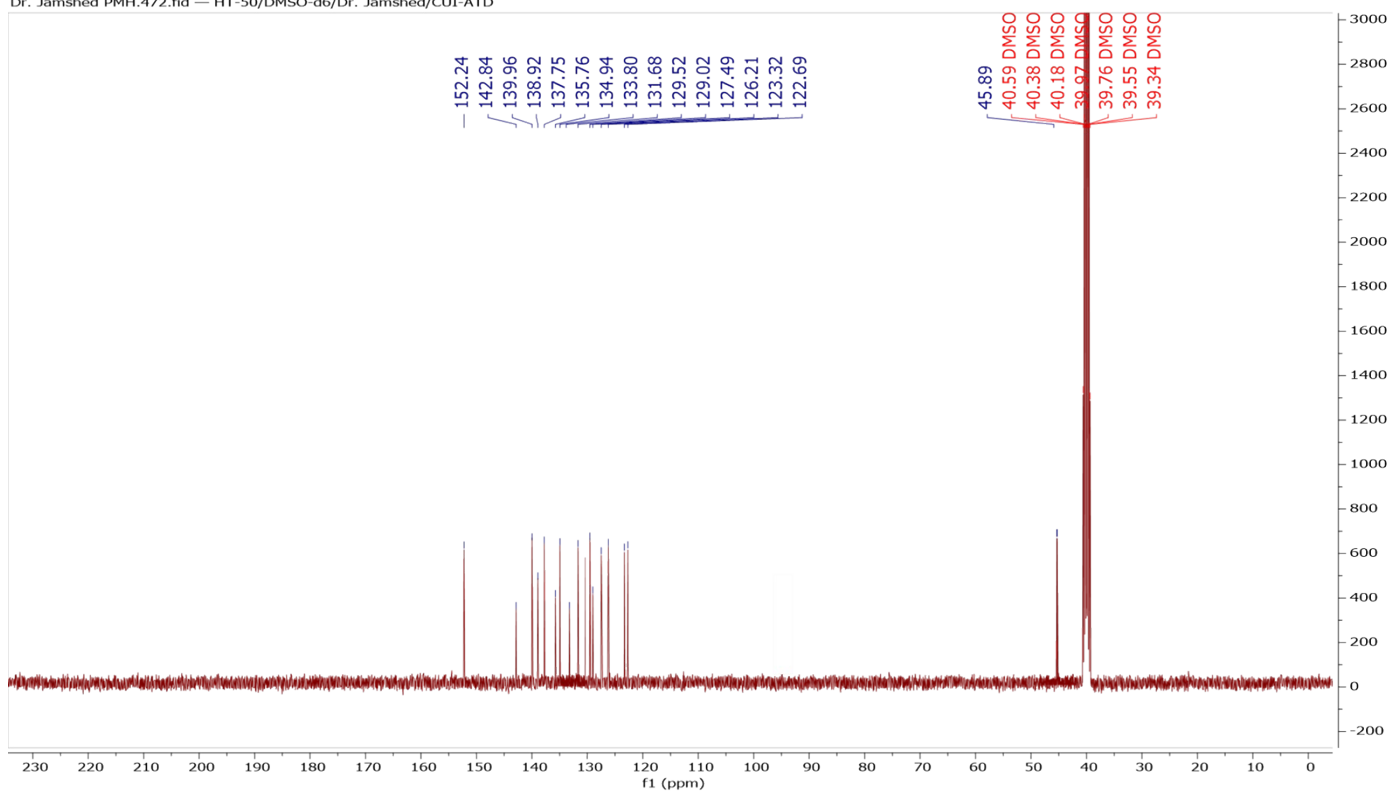

Figure 28: <sup>13</sup>CNMR of compound a16

**Compound a17**

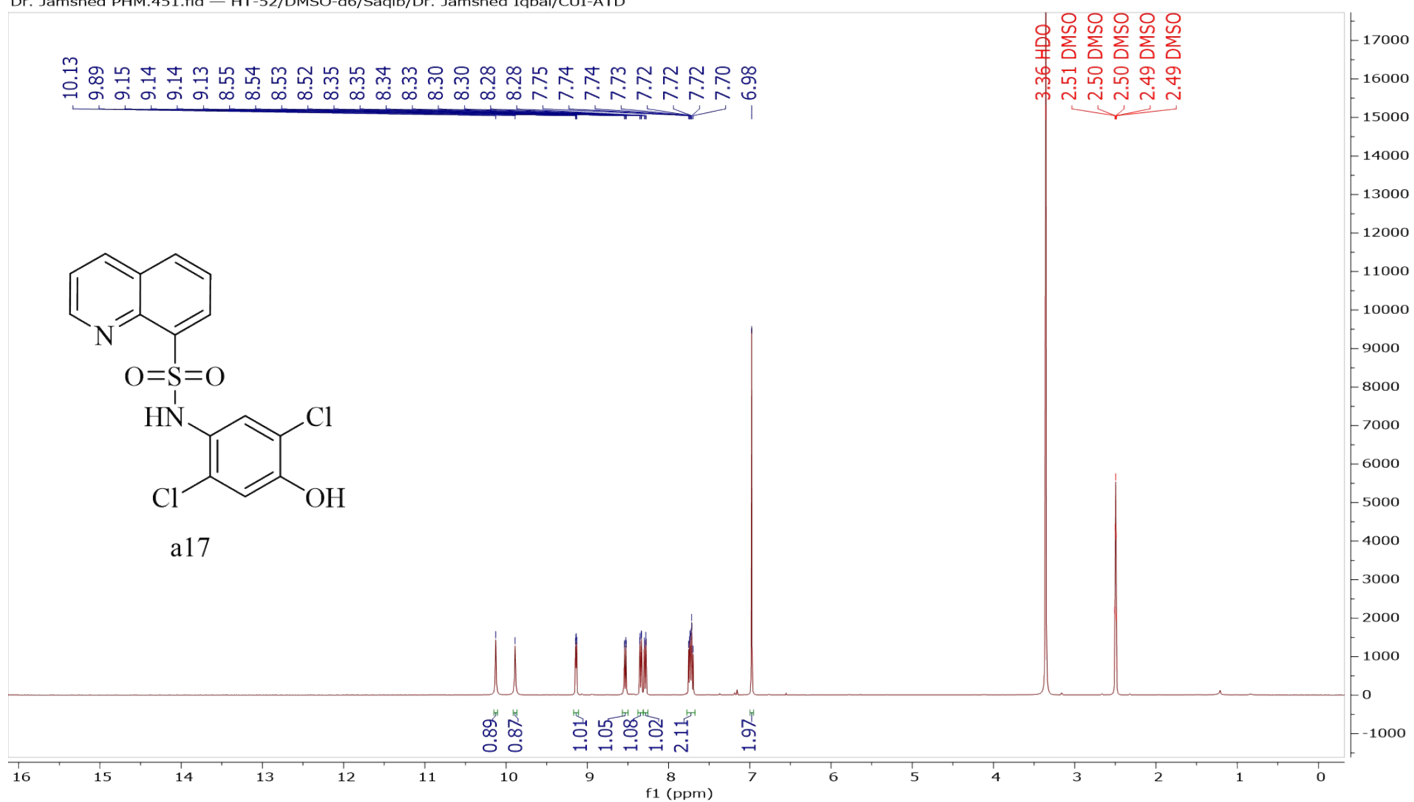

Figure 29: <sup>1</sup>H NMR of compound **a17**

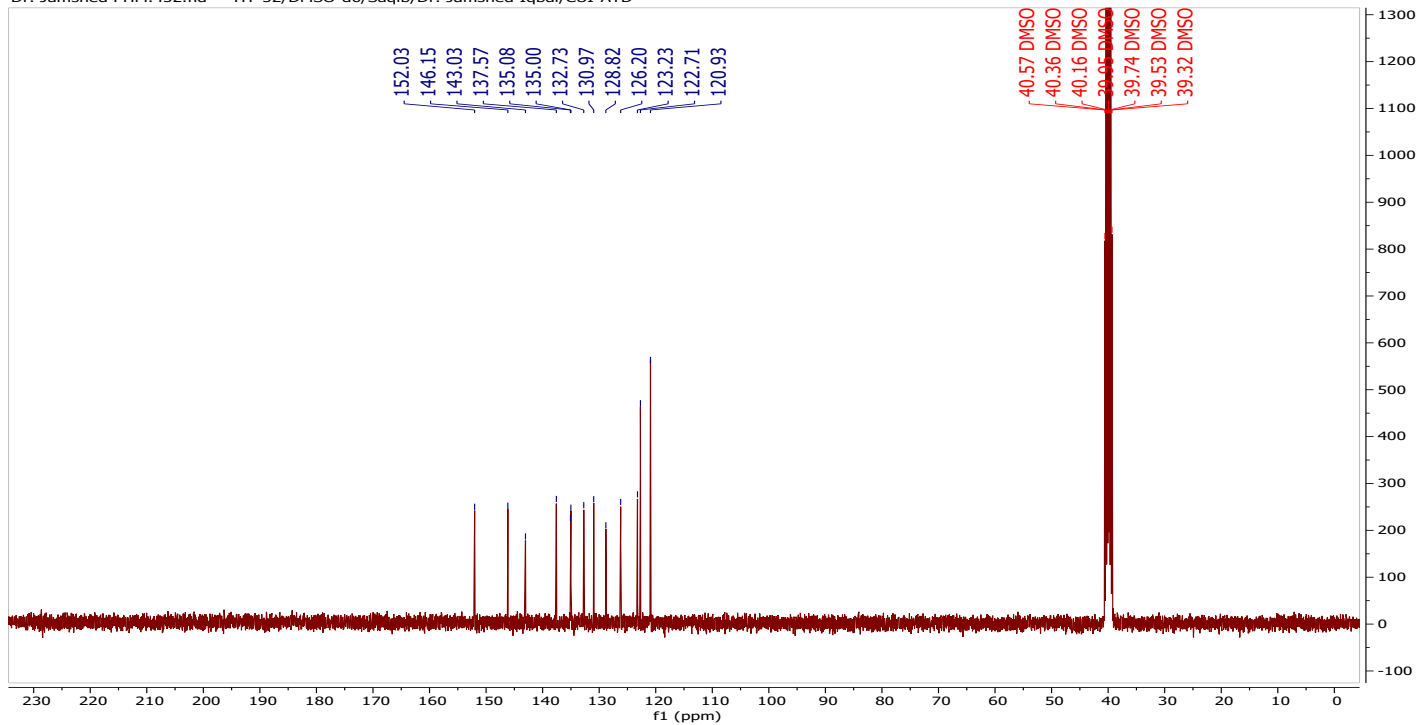

Figure 30: <sup>13</sup>C NMR of compound **a17**

# Compound 18

Dr. Jamshed PMH.467.fid — HT-49/DMSO-d6/Dr. Jamshed/CUI-ATD

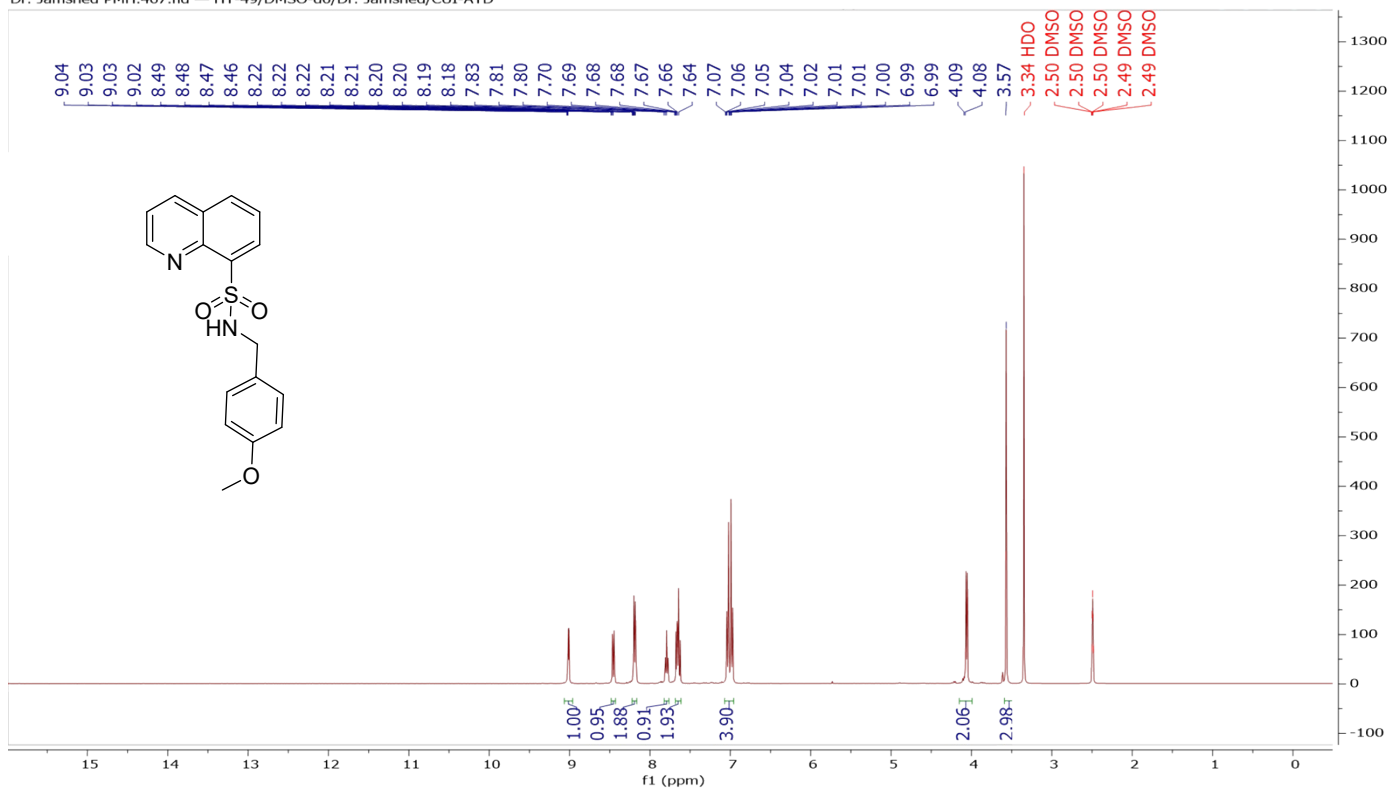

Figure 31:  $^1\text{H}$ NMR of compound a18

Dr. Jamshed PMH.468.fid — HT-49/DMSO-d6/Dr. Jamshed/CUI-ATD

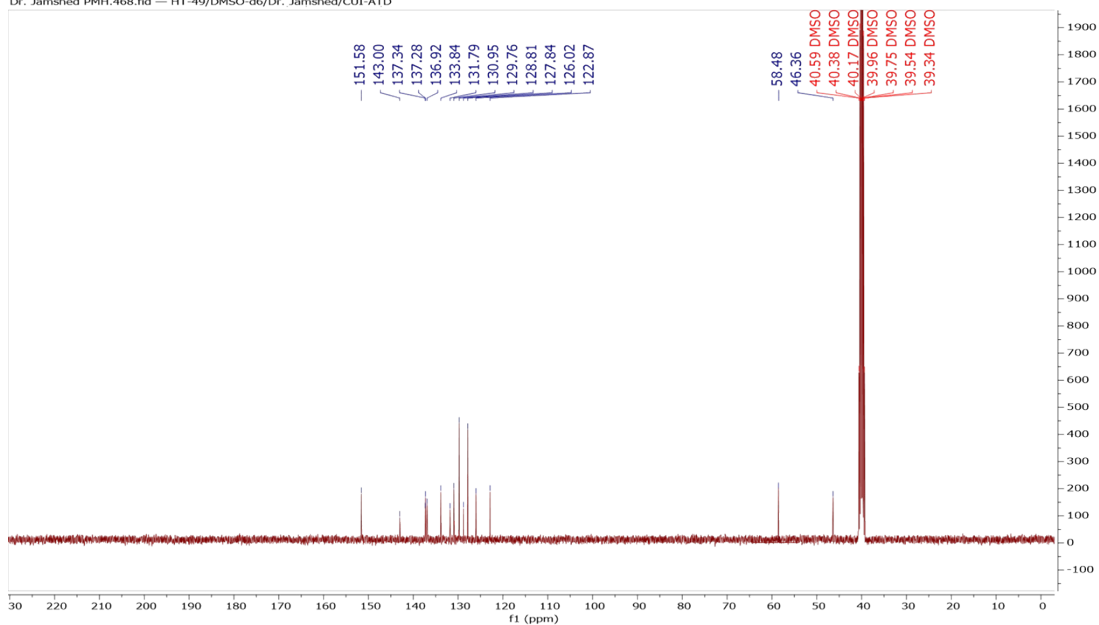

Figure 32:  $^{13}\text{C}$ NMR of compound a18

## 1.2 FTIR analysis

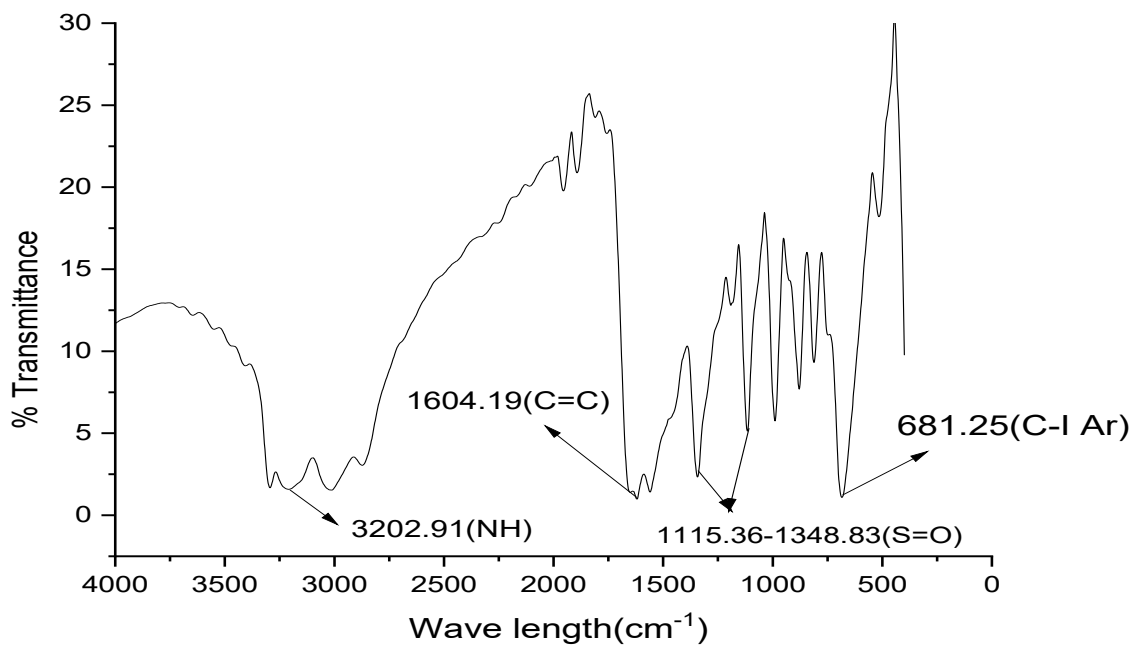

**Figure 33:** FTIR graph of compound a1

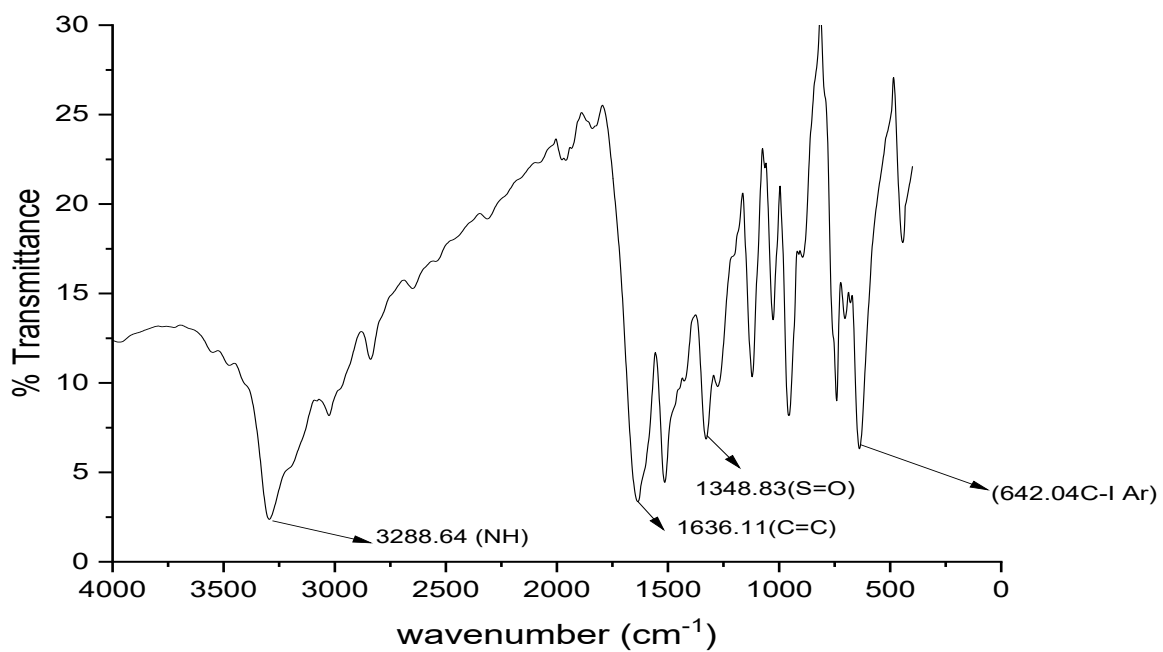

**Figure 34:** FTIR graph of compound a2

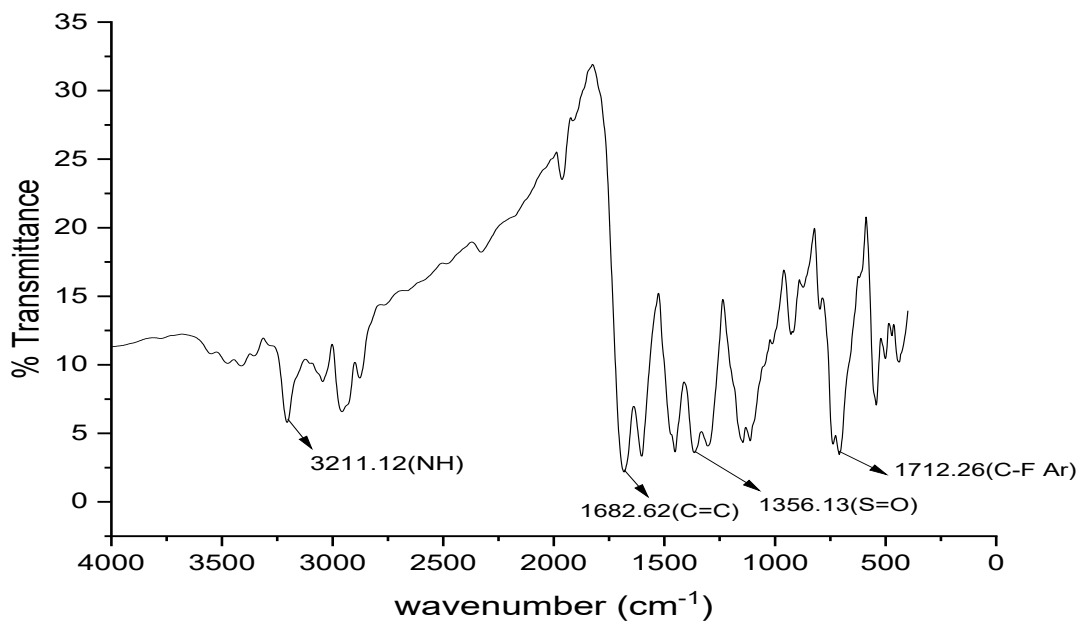

**Figure 35: FTIR graph of compound a3**

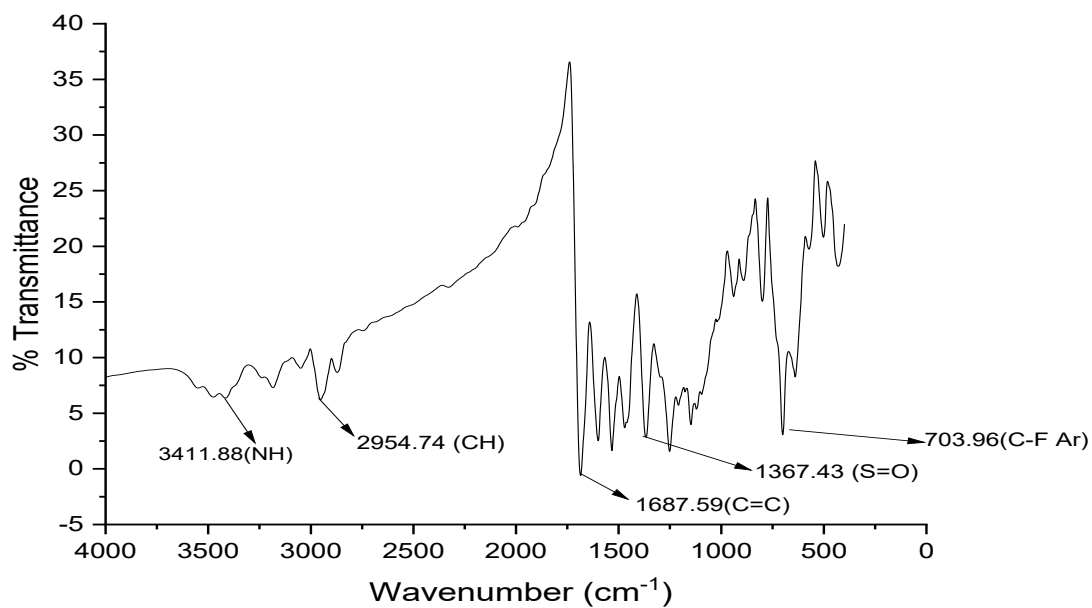

**Figure 36: FTIR graph of compound a4**



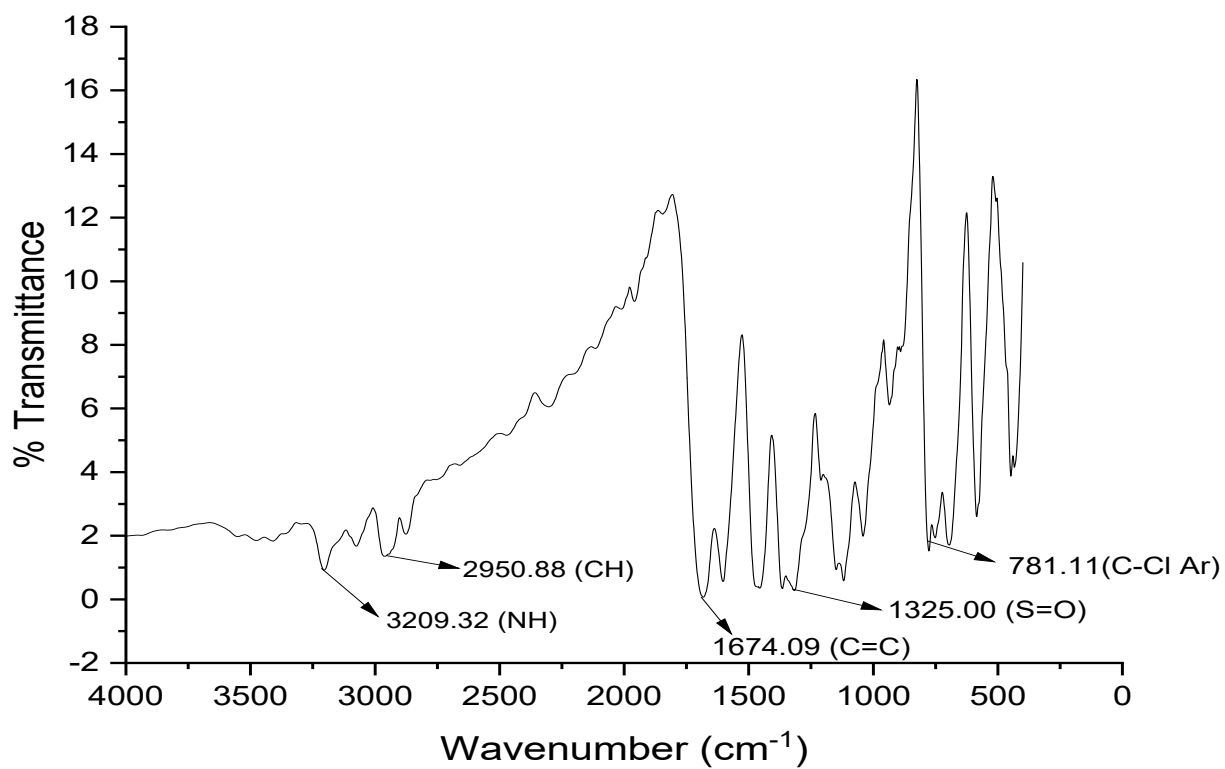

**Figure 37:** FTIR graph of compound a5

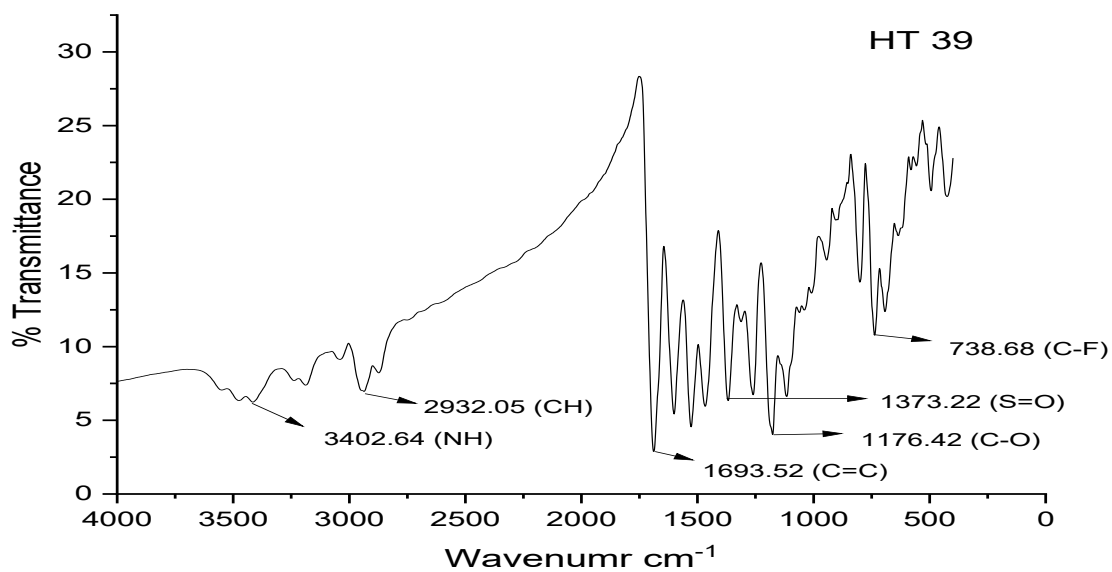

**Figure 38:** FTIR graph of compound a6

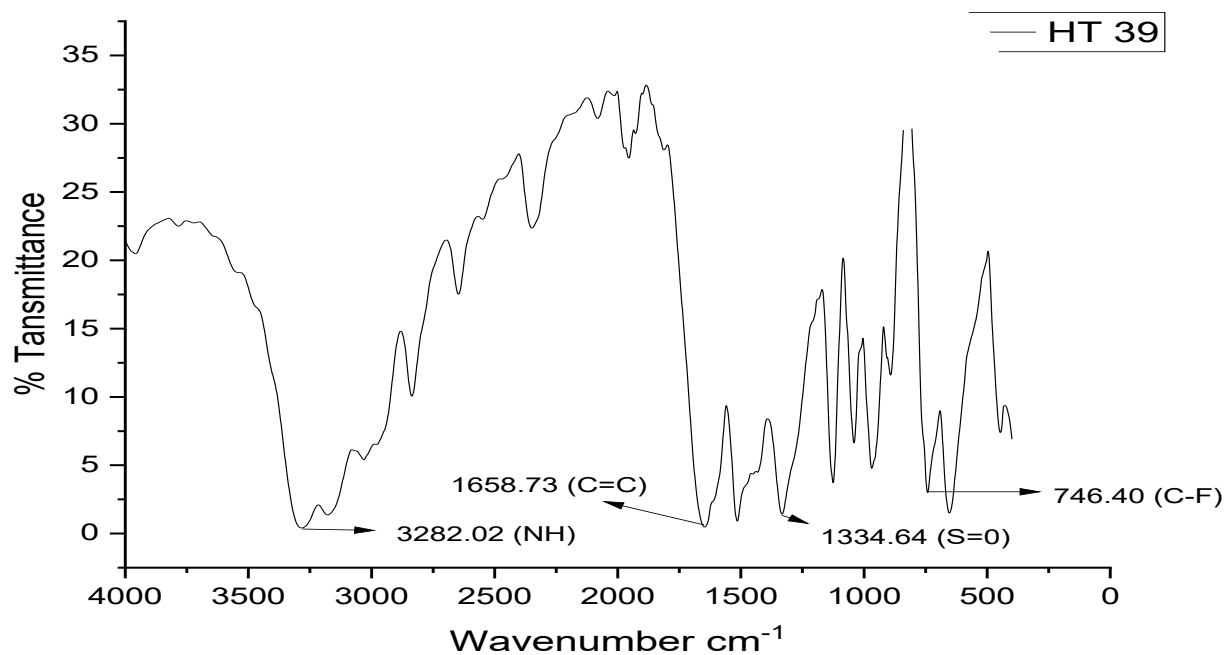

**Figure 39:** FTIR graph of compound a7

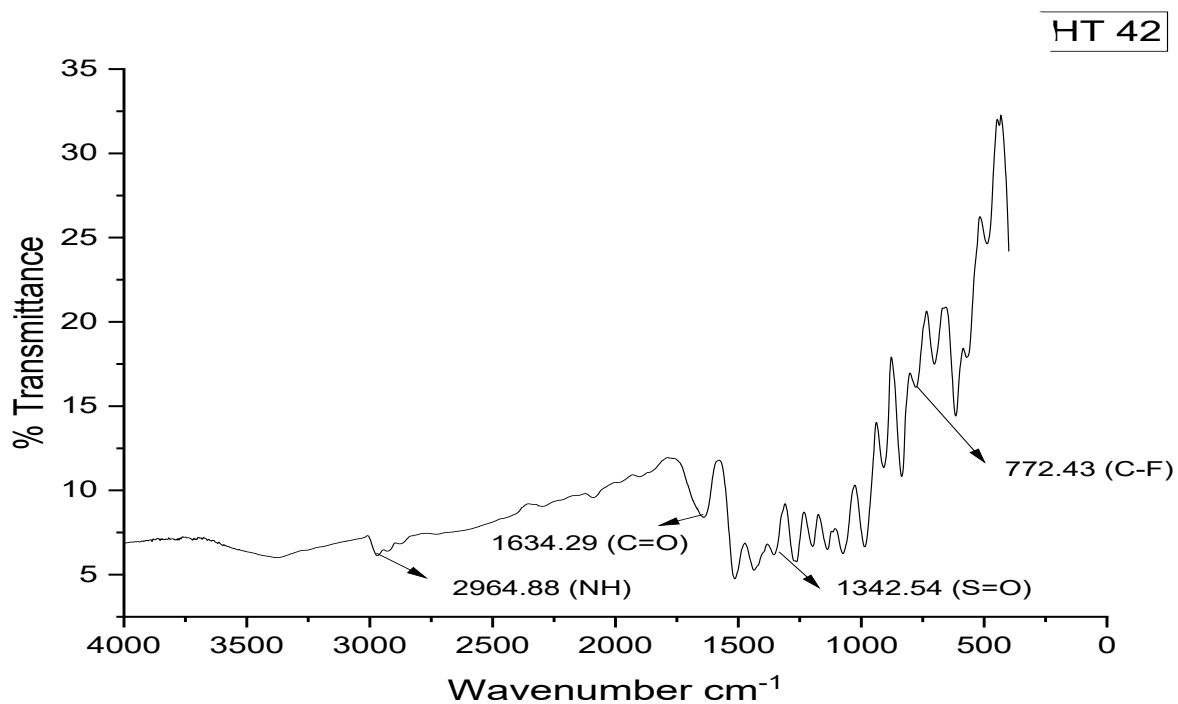

**Figure 40:** FTIR graph of compound a8

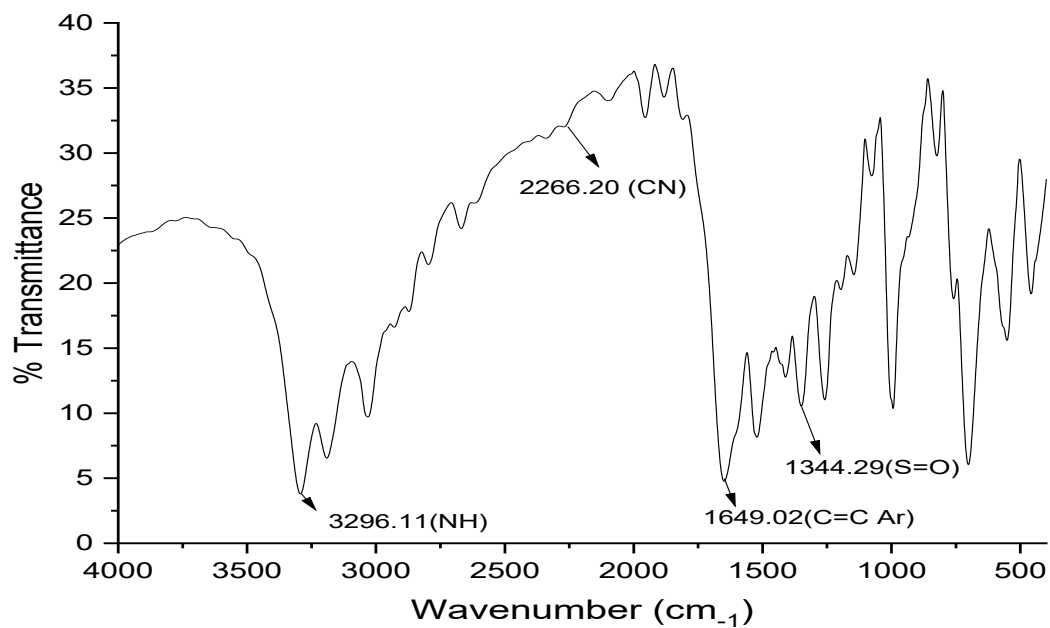

Figure 41 :FTIR graph of compound a9

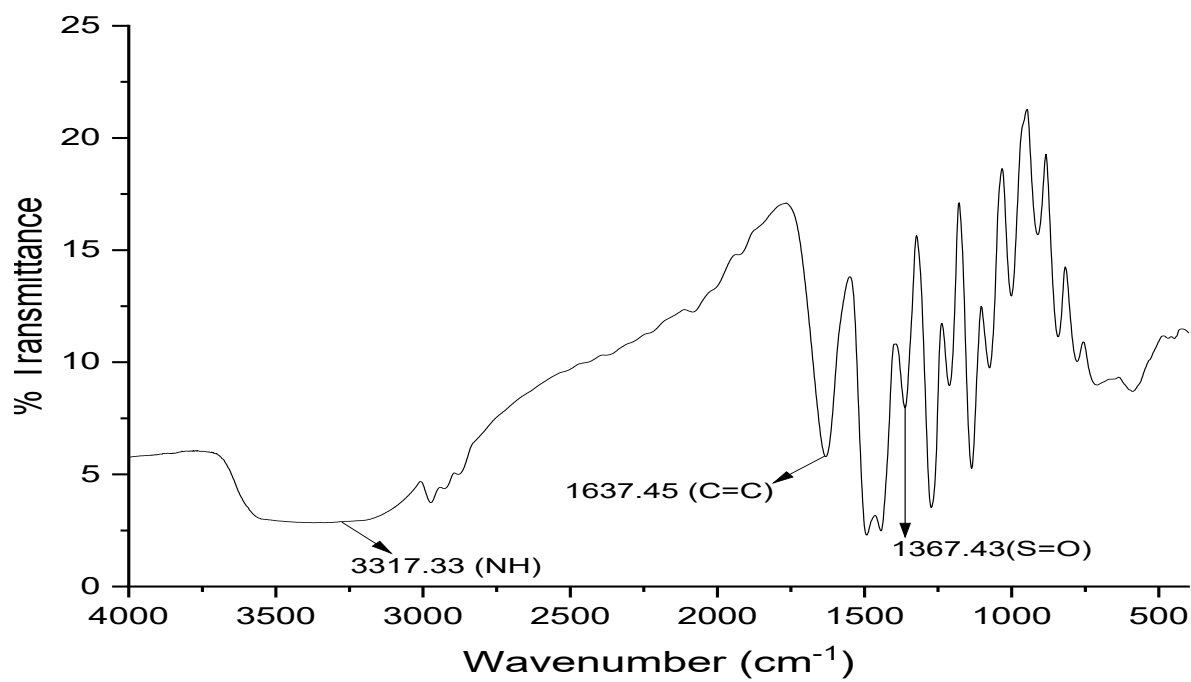

Figure 42: FTIR graph of compound a10

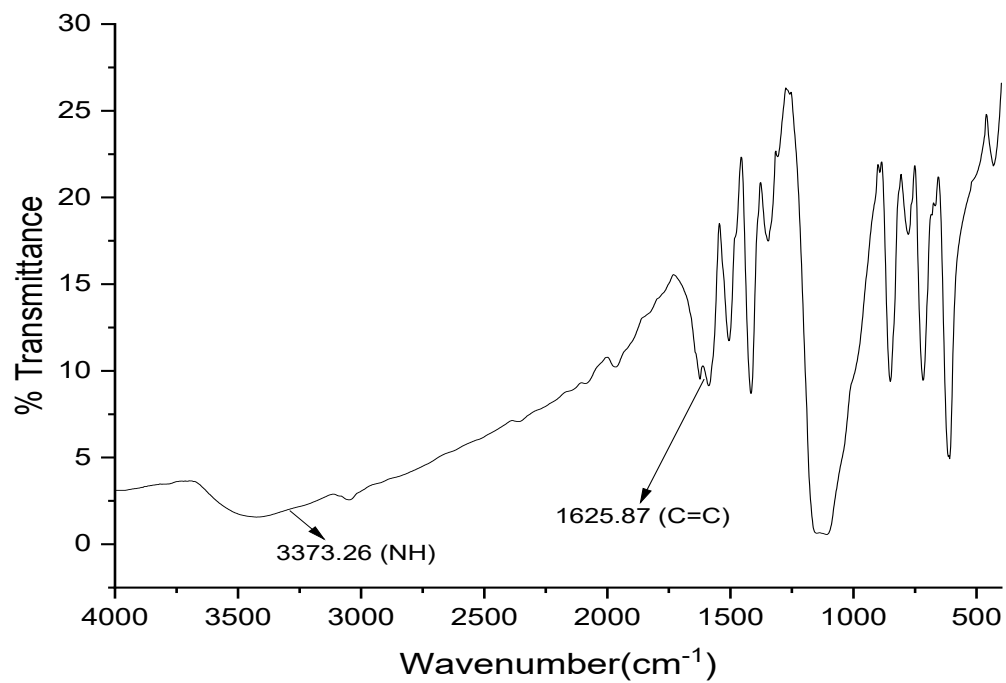

**Figure 43:** FTIR graph of compound **a11**

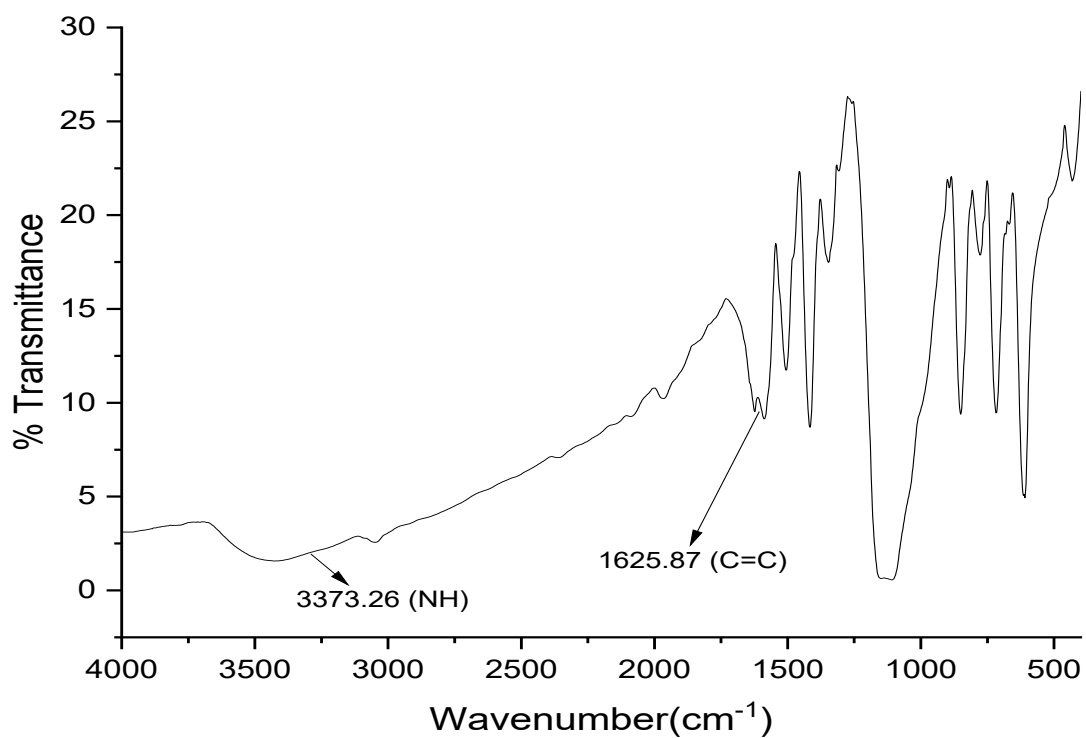

Figure 44: FTIR graph of compound **a12**

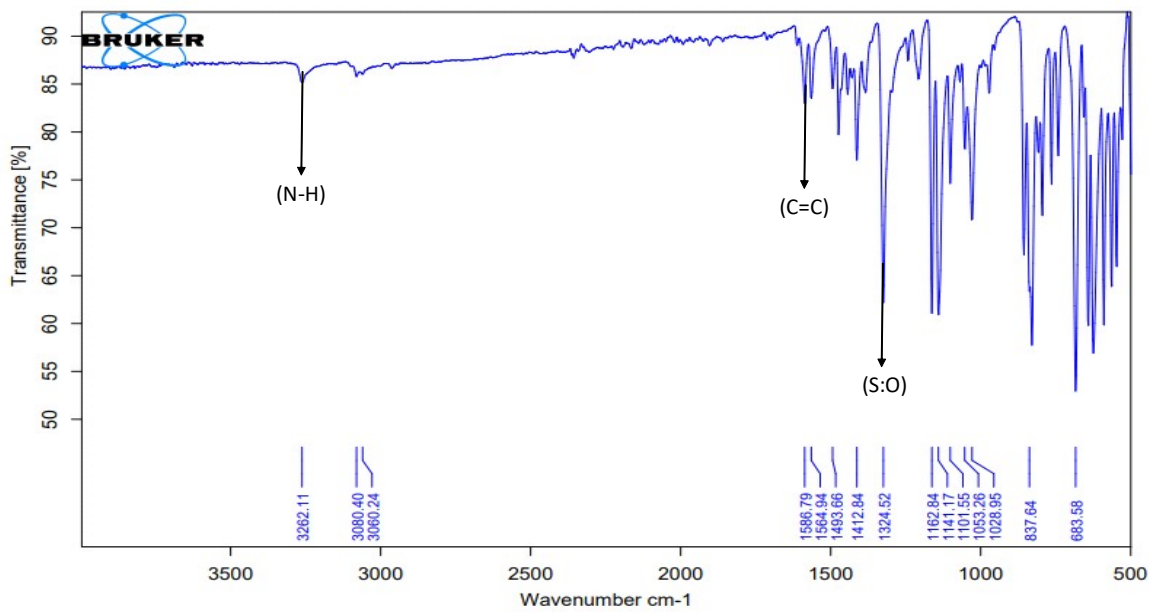

Figure 45: FTIR graph of compound **a13**

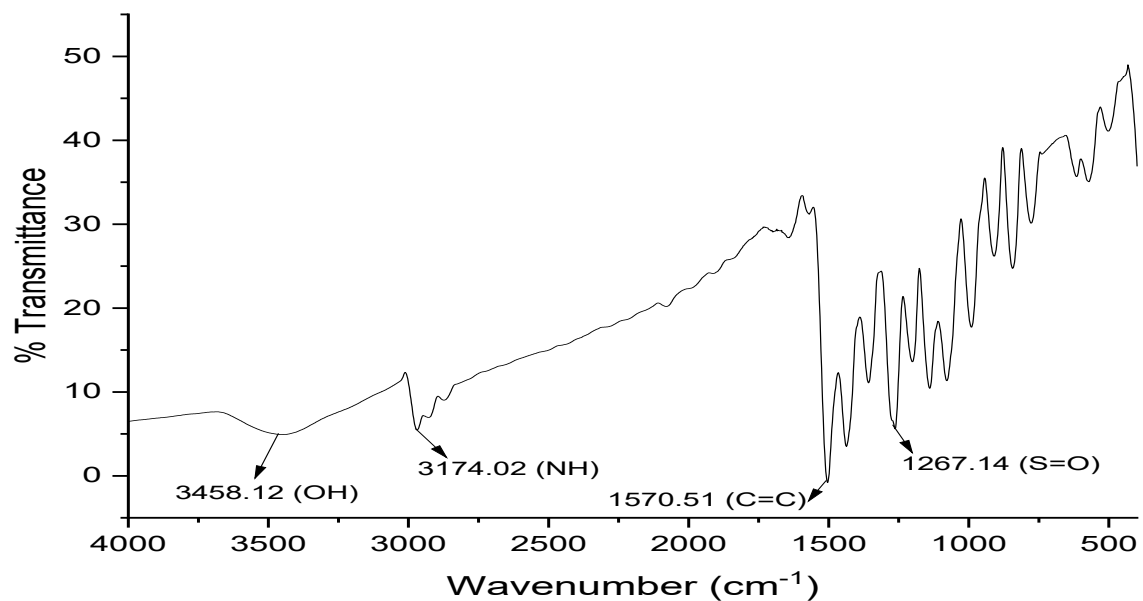

Figure 46: FTIR graph of compound a14

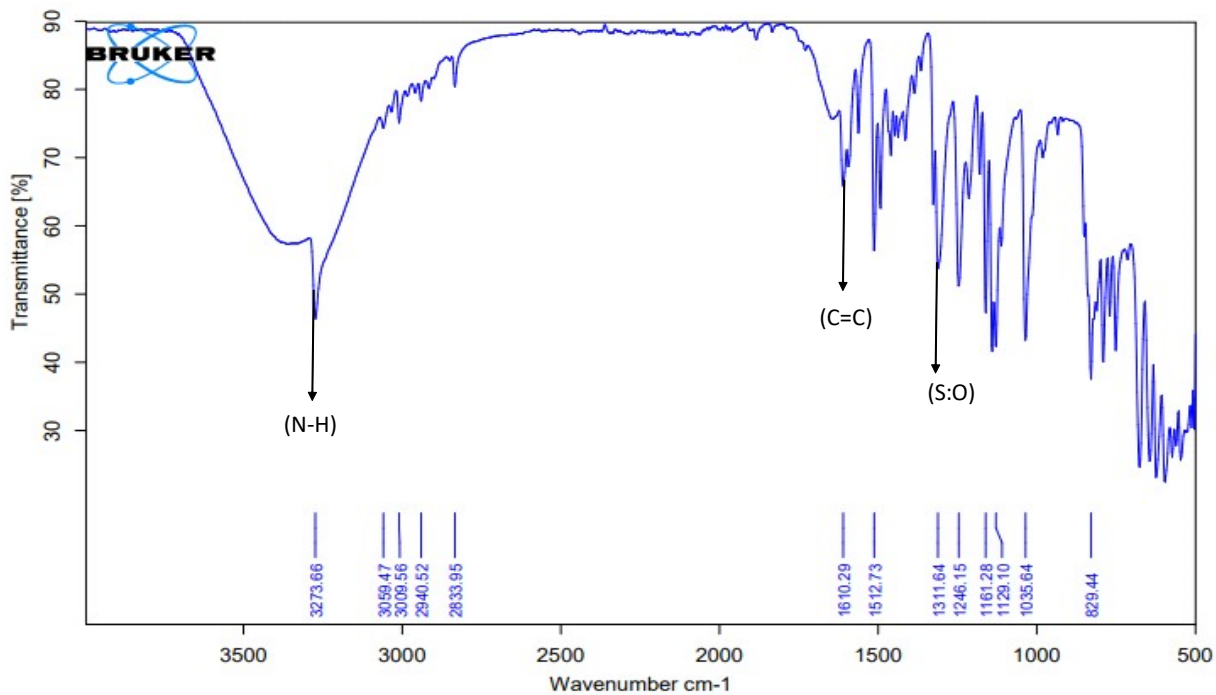

Figure 47: FTIR graph of compound a15

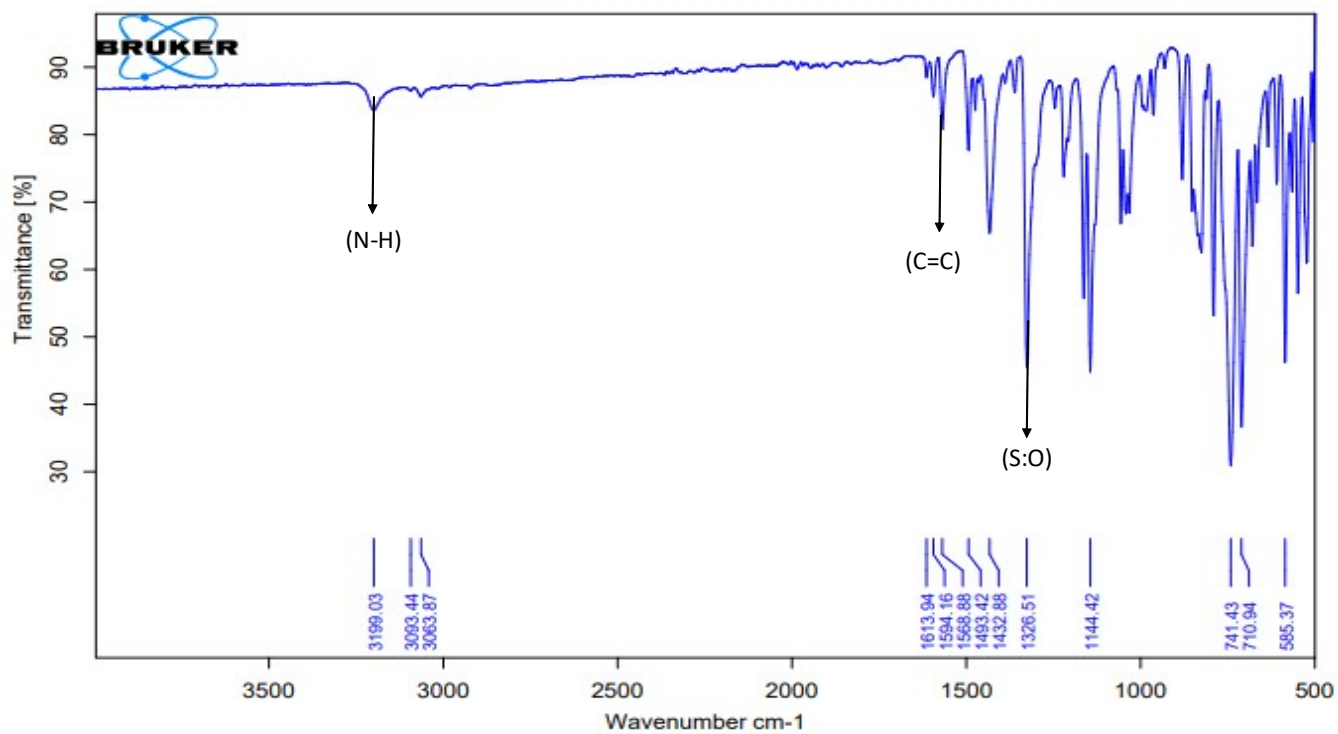

Figure 48: FTIR graph of compound a16

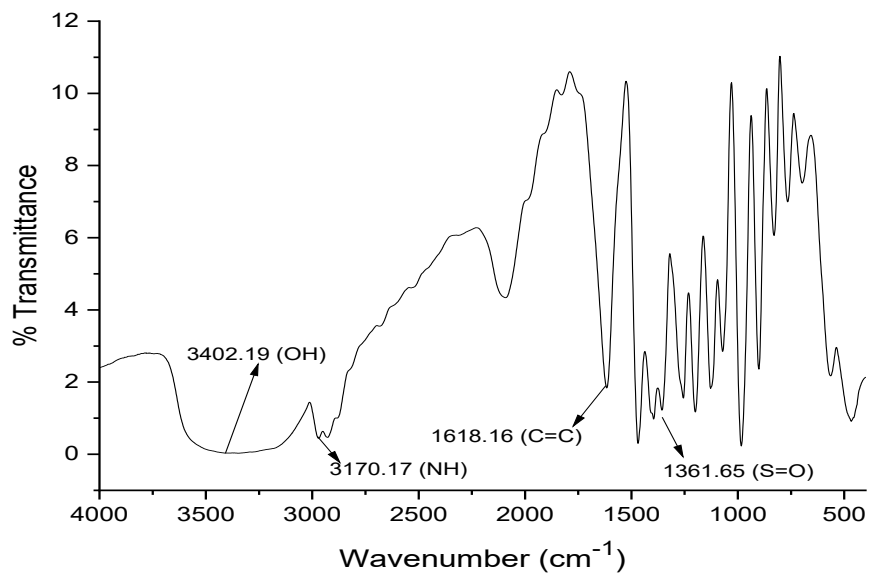

Figure 49: FTIR graph of compound a17

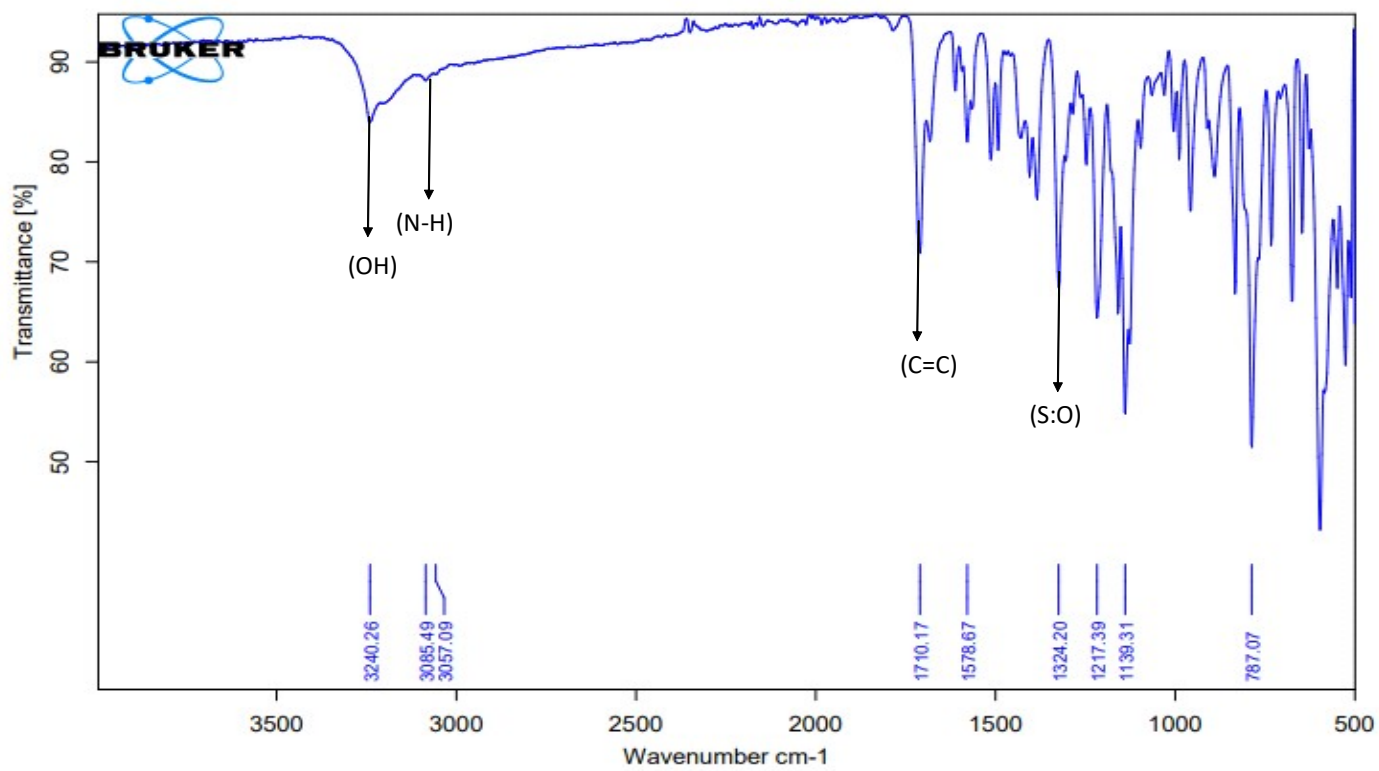

Figure 50: FTIR graph of compound a18



# HPLC Chromatogram

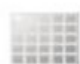

SHIMADZU  
LabSolutions

## Analysis Report

### <Sample Information>

|                  |                                   |              |                        |
|------------------|-----------------------------------|--------------|------------------------|
| Sample Name      | : Saqib HT37-1 by Zubair          | Sample Type  | : Unknown              |
| Sample ID        | : SHT37-1-1Z                      | Acquired by  | : System Administrator |
| Data Filename    | : Saqib HT37-1by Zubair Data1.lcd | Processed by | : System Administrator |
| Method Filename  | : Saqib HT35-1 by Zubair.lcm      |              |                        |
| Batch Filename   | :                                 |              |                        |
| Vial #           | : 1-1                             |              |                        |
| Injection Volume | : 20 uL                           |              |                        |
| Date Acquired    | : 10-Jan-24 7:21:03 PM            |              |                        |
| Date Processed   | : 10-Jan-24 7:31:14 PM            |              |                        |

### <Chromatogram>

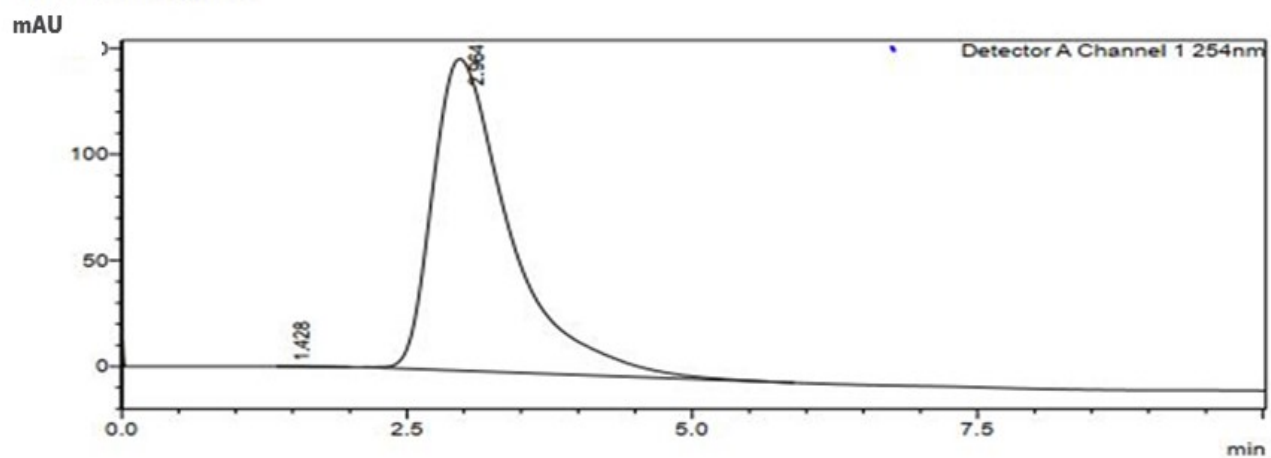

Figure 51: Chromatogram of compound a5

## <Sample Information>

|                  |                                    |              |                        |
|------------------|------------------------------------|--------------|------------------------|
| Sample Name      | : Saqib HT35-1 by Zubair           | Sample Type  | : Unknown              |
| Sample ID        | : SHT35-1Z                         | Acquired by  | : System Administrator |
| Data Filename    | : Saqib HT35-1 by Zubair Data1.lcd | Processed by | : System Administrator |
| Method Filename  | : Saqib HT35-1 by Zubair.lcm       |              |                        |
| Batch Filename   | :                                  |              |                        |
| Vial #           | : 1-1                              |              |                        |
| Injection Volume | : 20 uL                            |              |                        |
| Date Acquired    | : 10-Jan-24 3:04:44 PM             |              |                        |
| Date Processed   | : 10-Jan-24 3:19:56 PM             |              |                        |

## <Chromatogram>

mAU

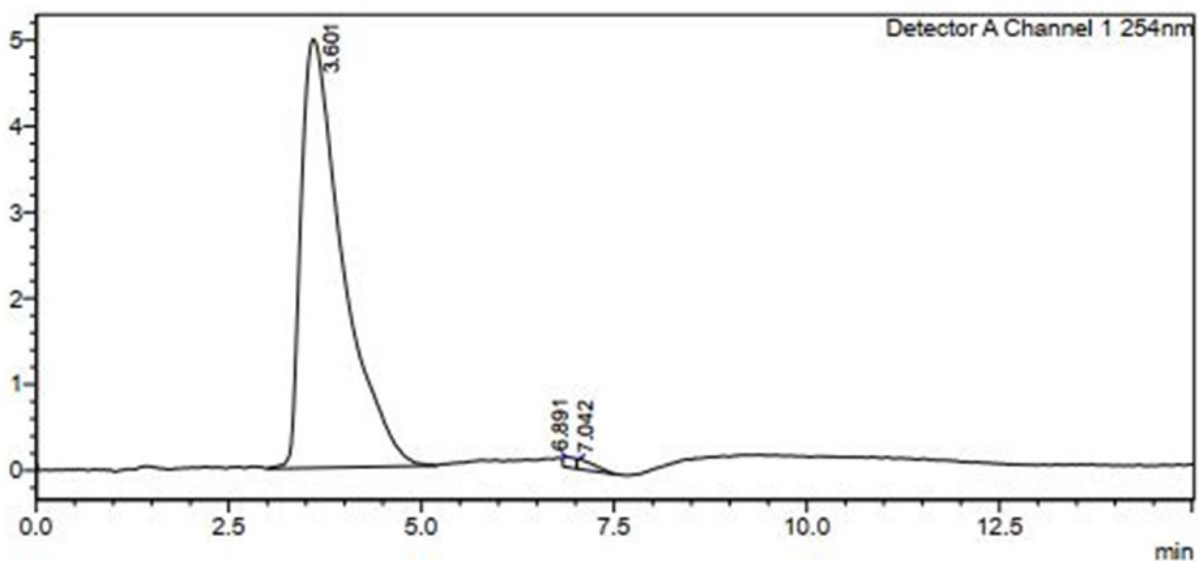

Figure 52: Chromatogram of compound a3

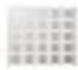

SHIMADZU

LabSolutions

# Analysis Report

## <Sample Information>

|                  |                                    |              |                        |
|------------------|------------------------------------|--------------|------------------------|
| Sample Name      | : Saqlb HT36-1 by Zubair           | Sample Type  | : Unknown              |
| Sample ID        | : SHT36-1Z                         |              |                        |
| Data Filename    | : Saqlb HT36-1 by Zubair Data1.lcd |              |                        |
| Method Filename  | : Saqlb Sample by zubair HT35.lcm  |              |                        |
| Batch Filename   | :                                  |              |                        |
| Vial #           | : 1-1                              |              |                        |
| Injection Volume | : 20 uL                            | Acquired by  | : System Administrator |
| Date Acquired    | : 10-Jan-24 4:03:15 PM             | Processed by | : System Administrator |
| Date Processed   | : 10-Jan-24 4:33:27 PM             |              |                        |

## <Chromatogram>

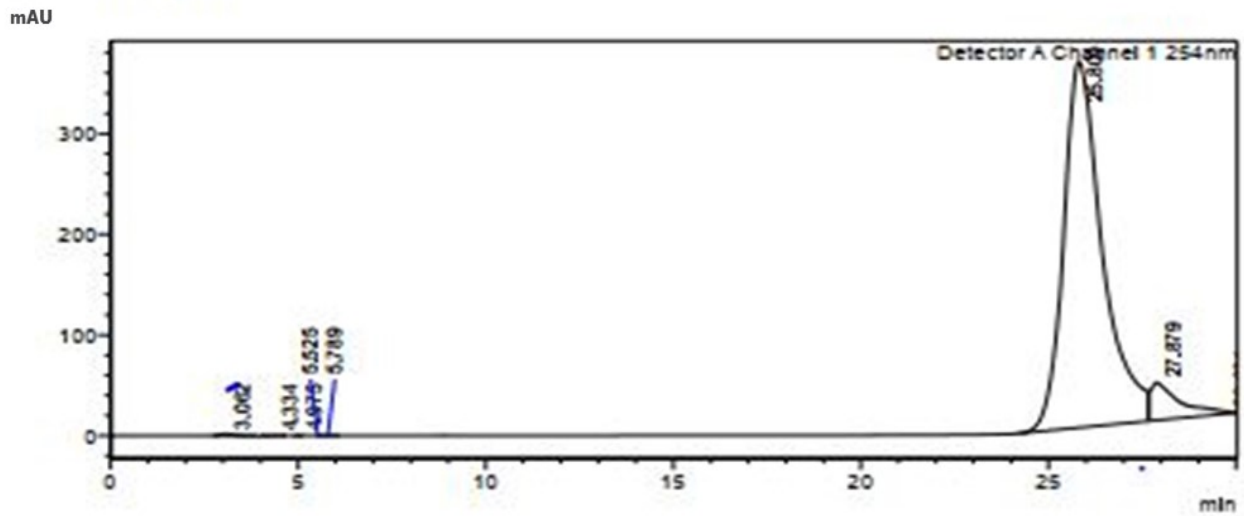

Figure 53: Chromatogram of compound a4

**Table 1:** The docking scores of synthesized compounds on MAO-A, MAO-B, AChE, and BChE

| Molecule    | MAO A              | MAO A  | AChE  | BChE  |
|-------------|--------------------|--------|-------|-------|
|             | S value (kcal/mol) |        |       |       |
| <b>a1.</b>  | -8.76              | -9.87  | -8.18 | -3.18 |
| <b>a2.</b>  | -8.50              | -8.73  | -7.43 | -4.88 |
| <b>a3.</b>  | -8.55              | -9.65  | -7.03 | -3.70 |
| <b>a4.</b>  | -8.62              | -9.94  | -8.18 | -4.02 |
| <b>a5.</b>  | -10.40             | -9.73  | -5.78 | -4.84 |
| <b>a6.</b>  | -9.26              | -9.57  | -7.46 | -7.68 |
| <b>a7.</b>  | -8.79              | -7.48  | -3.57 | -3.88 |
| <b>a8.</b>  | -8.51              | -9.59  | -2.97 | -3.55 |
| <b>a9.</b>  | -8.58              | -9.88  | -4.15 | -2.48 |
| <b>a10.</b> | -8.36              | -9.41  | -7.13 | -2.58 |
| <b>a11.</b> | -9.36              | -10.52 | -8.88 | -6.48 |
| <b>a12.</b> | -7.39              | -10.57 | -7.38 | -6.59 |
| <b>a13.</b> | -8.76              | -10.07 | -6.59 | -3.08 |
| <b>a14.</b> | -9.23              | -9.49  | -7.01 | -6.89 |
| <b>a15.</b> | -9.41              | -8.43  | -7.98 | -2.88 |
| <b>a16.</b> | -7.54              | -7.93  | -7.81 | -4.36 |
| <b>a17.</b> | -8.90              | -8.19  | -6.20 | -3.31 |
| <b>a18.</b> | -8.54              | -8.60  | -7.32 | -5.38 |

**Table 2:** IC<sub>50</sub> values of synthesized compounds against monoamine oxidase

| Code | Graph | Graph |
|------|-------|-------|
| a1   |       |       |
| a2   |       |       |
| a3   |       |       |
| a4   |       |       |
| a5   |       |       |

|     |                                                                                                                                                                                                                                 |                                                                                                                                                                                                                                 |
|-----|---------------------------------------------------------------------------------------------------------------------------------------------------------------------------------------------------------------------------------|---------------------------------------------------------------------------------------------------------------------------------------------------------------------------------------------------------------------------------|
| a6  | <p>Graph a6: fluorescence vs Concentration. The y-axis ranges from 2500 to 3500, and the x-axis from -5 to 0. The data shows a decreasing trend from approximately 3300 at concentration -4.5 to 2600 at concentration -1.</p>  | <p>Graph a6: fluorescence vs Concentration. The y-axis ranges from 1000 to 1800, and the x-axis from -5 to 0. The data shows a decreasing trend from approximately 1550 at concentration -4.5 to 1200 at concentration -1.</p>  |
| a7  | <p>Graph a7: fluorescence vs Concentration. The y-axis ranges from 0 to 4000, and the x-axis from -5 to 0. The data shows a decreasing trend from approximately 3400 at concentration -4.5 to 2000 at concentration -1.</p>     | <p>Graph a7: fluorescence vs Concentration. The y-axis ranges from 1000 to 2500, and the x-axis from -5 to 0. The data shows a decreasing trend from approximately 2100 at concentration -4.5 to 1400 at concentration -1.</p>  |
| a8  | <p>Graph a8: fluorescence vs Concentration. The y-axis ranges from 0 to 3000, and the x-axis from -5 to 0. The data shows a decreasing trend from approximately 2500 at concentration -4.5 to 1400 at concentration -1.</p>     | <p>Graph a8: fluorescence vs Concentration. The y-axis ranges from 1000 to 3000, and the x-axis from -5 to 0. The data shows a decreasing trend from approximately 2400 at concentration -4.5 to 1600 at concentration -1.</p>  |
| a9  | <p>Graph a9: fluorescence vs Concentration. The y-axis ranges from 0 to 2000, and the x-axis from -5 to 0. The data shows a decreasing trend from approximately 1600 at concentration -4.5 to 900 at concentration -1.</p>      | <p>Graph a9: fluorescence vs Concentration. The y-axis ranges from 1800 to 3000, and the x-axis from -5 to 0. The data shows a decreasing trend from approximately 2500 at concentration -4.5 to 1900 at concentration -1.</p>  |
| a10 | <p>Graph a10: fluorescence vs Concentration. The y-axis ranges from 1500 to 3000, and the x-axis from -5 to 0. The data shows a decreasing trend from approximately 2600 at concentration -4.5 to 1900 at concentration -1.</p> | <p>Graph a10: fluorescence vs Concentration. The y-axis ranges from 1800 to 2800, and the x-axis from -5 to 0. The data shows a decreasing trend from approximately 2350 at concentration -4.5 to 2000 at concentration -1.</p> |

|     |  |  |
|-----|--|--|
| a11 |  |  |
| a12 |  |  |
| a13 |  |  |
| a14 |  |  |
| a15 |  |  |

| a16           | 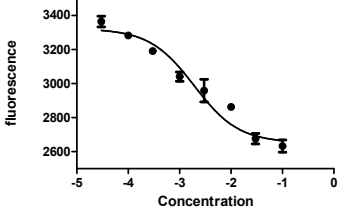 <table border="1"><caption>Data for a16 (left column)</caption><thead><tr><th>Concentration</th><th>Fluorescence</th></tr></thead><tbody><tr><td>-5</td><td>3350</td></tr><tr><td>-4</td><td>3300</td></tr><tr><td>-3</td><td>3050</td></tr><tr><td>-2</td><td>2850</td></tr><tr><td>-1</td><td>2650</td></tr></tbody></table>  | Concentration | Fluorescence | -5 | 3350 | -4 | 3300 | -3 | 3050 | -2 | 2850 | -1 | 2650 |  <table border="1"><caption>Data for a16 (right column)</caption><thead><tr><th>Concentration</th><th>Fluorescence</th></tr></thead><tbody><tr><td>-5</td><td>1750</td></tr><tr><td>-4</td><td>1700</td></tr><tr><td>-3</td><td>1550</td></tr><tr><td>-2</td><td>1350</td></tr><tr><td>-1</td><td>1150</td></tr></tbody></table> | Concentration | Fluorescence | -5 | 1750 | -4 | 1700 | -3 | 1550 | -2 | 1350 | -1 | 1150 |
|---------------|-------------------------------------------------------------------------------------------------------------------------------------------------------------------------------------------------------------------------------------------------------------------------------------------------------------------------------------------------------------------------------------------------------------------|---------------|--------------|----|------|----|------|----|------|----|------|----|------|--------------------------------------------------------------------------------------------------------------------------------------------------------------------------------------------------------------------------------------------------------------------------------------------------------------------------------------------------------------------------------------------------------------------|---------------|--------------|----|------|----|------|----|------|----|------|----|------|
| Concentration | Fluorescence                                                                                                                                                                                                                                                                                                                                                                                                      |               |              |    |      |    |      |    |      |    |      |    |      |                                                                                                                                                                                                                                                                                                                                                                                                                    |               |              |    |      |    |      |    |      |    |      |    |      |
| -5            | 3350                                                                                                                                                                                                                                                                                                                                                                                                              |               |              |    |      |    |      |    |      |    |      |    |      |                                                                                                                                                                                                                                                                                                                                                                                                                    |               |              |    |      |    |      |    |      |    |      |    |      |
| -4            | 3300                                                                                                                                                                                                                                                                                                                                                                                                              |               |              |    |      |    |      |    |      |    |      |    |      |                                                                                                                                                                                                                                                                                                                                                                                                                    |               |              |    |      |    |      |    |      |    |      |    |      |
| -3            | 3050                                                                                                                                                                                                                                                                                                                                                                                                              |               |              |    |      |    |      |    |      |    |      |    |      |                                                                                                                                                                                                                                                                                                                                                                                                                    |               |              |    |      |    |      |    |      |    |      |    |      |
| -2            | 2850                                                                                                                                                                                                                                                                                                                                                                                                              |               |              |    |      |    |      |    |      |    |      |    |      |                                                                                                                                                                                                                                                                                                                                                                                                                    |               |              |    |      |    |      |    |      |    |      |    |      |
| -1            | 2650                                                                                                                                                                                                                                                                                                                                                                                                              |               |              |    |      |    |      |    |      |    |      |    |      |                                                                                                                                                                                                                                                                                                                                                                                                                    |               |              |    |      |    |      |    |      |    |      |    |      |
| Concentration | Fluorescence                                                                                                                                                                                                                                                                                                                                                                                                      |               |              |    |      |    |      |    |      |    |      |    |      |                                                                                                                                                                                                                                                                                                                                                                                                                    |               |              |    |      |    |      |    |      |    |      |    |      |
| -5            | 1750                                                                                                                                                                                                                                                                                                                                                                                                              |               |              |    |      |    |      |    |      |    |      |    |      |                                                                                                                                                                                                                                                                                                                                                                                                                    |               |              |    |      |    |      |    |      |    |      |    |      |
| -4            | 1700                                                                                                                                                                                                                                                                                                                                                                                                              |               |              |    |      |    |      |    |      |    |      |    |      |                                                                                                                                                                                                                                                                                                                                                                                                                    |               |              |    |      |    |      |    |      |    |      |    |      |
| -3            | 1550                                                                                                                                                                                                                                                                                                                                                                                                              |               |              |    |      |    |      |    |      |    |      |    |      |                                                                                                                                                                                                                                                                                                                                                                                                                    |               |              |    |      |    |      |    |      |    |      |    |      |
| -2            | 1350                                                                                                                                                                                                                                                                                                                                                                                                              |               |              |    |      |    |      |    |      |    |      |    |      |                                                                                                                                                                                                                                                                                                                                                                                                                    |               |              |    |      |    |      |    |      |    |      |    |      |
| -1            | 1150                                                                                                                                                                                                                                                                                                                                                                                                              |               |              |    |      |    |      |    |      |    |      |    |      |                                                                                                                                                                                                                                                                                                                                                                                                                    |               |              |    |      |    |      |    |      |    |      |    |      |
| a17           |  <table border="1"><caption>Data for a17 (left column)</caption><thead><tr><th>Concentration</th><th>Fluorescence</th></tr></thead><tbody><tr><td>-5</td><td>3500</td></tr><tr><td>-4</td><td>3500</td></tr><tr><td>-3</td><td>3200</td></tr><tr><td>-2</td><td>3050</td></tr><tr><td>-1</td><td>2750</td></tr></tbody></table>  | Concentration | Fluorescence | -5 | 3500 | -4 | 3500 | -3 | 3200 | -2 | 3050 | -1 | 2750 |  <table border="1"><caption>Data for a17 (right column)</caption><thead><tr><th>Concentration</th><th>Fluorescence</th></tr></thead><tbody><tr><td>-5</td><td>2550</td></tr><tr><td>-4</td><td>2600</td></tr><tr><td>-3</td><td>2300</td></tr><tr><td>-2</td><td>2200</td></tr><tr><td>-1</td><td>1900</td></tr></tbody></table> | Concentration | Fluorescence | -5 | 2550 | -4 | 2600 | -3 | 2300 | -2 | 2200 | -1 | 1900 |
| Concentration | Fluorescence                                                                                                                                                                                                                                                                                                                                                                                                      |               |              |    |      |    |      |    |      |    |      |    |      |                                                                                                                                                                                                                                                                                                                                                                                                                    |               |              |    |      |    |      |    |      |    |      |    |      |
| -5            | 3500                                                                                                                                                                                                                                                                                                                                                                                                              |               |              |    |      |    |      |    |      |    |      |    |      |                                                                                                                                                                                                                                                                                                                                                                                                                    |               |              |    |      |    |      |    |      |    |      |    |      |
| -4            | 3500                                                                                                                                                                                                                                                                                                                                                                                                              |               |              |    |      |    |      |    |      |    |      |    |      |                                                                                                                                                                                                                                                                                                                                                                                                                    |               |              |    |      |    |      |    |      |    |      |    |      |
| -3            | 3200                                                                                                                                                                                                                                                                                                                                                                                                              |               |              |    |      |    |      |    |      |    |      |    |      |                                                                                                                                                                                                                                                                                                                                                                                                                    |               |              |    |      |    |      |    |      |    |      |    |      |
| -2            | 3050                                                                                                                                                                                                                                                                                                                                                                                                              |               |              |    |      |    |      |    |      |    |      |    |      |                                                                                                                                                                                                                                                                                                                                                                                                                    |               |              |    |      |    |      |    |      |    |      |    |      |
| -1            | 2750                                                                                                                                                                                                                                                                                                                                                                                                              |               |              |    |      |    |      |    |      |    |      |    |      |                                                                                                                                                                                                                                                                                                                                                                                                                    |               |              |    |      |    |      |    |      |    |      |    |      |
| Concentration | Fluorescence                                                                                                                                                                                                                                                                                                                                                                                                      |               |              |    |      |    |      |    |      |    |      |    |      |                                                                                                                                                                                                                                                                                                                                                                                                                    |               |              |    |      |    |      |    |      |    |      |    |      |
| -5            | 2550                                                                                                                                                                                                                                                                                                                                                                                                              |               |              |    |      |    |      |    |      |    |      |    |      |                                                                                                                                                                                                                                                                                                                                                                                                                    |               |              |    |      |    |      |    |      |    |      |    |      |
| -4            | 2600                                                                                                                                                                                                                                                                                                                                                                                                              |               |              |    |      |    |      |    |      |    |      |    |      |                                                                                                                                                                                                                                                                                                                                                                                                                    |               |              |    |      |    |      |    |      |    |      |    |      |
| -3            | 2300                                                                                                                                                                                                                                                                                                                                                                                                              |               |              |    |      |    |      |    |      |    |      |    |      |                                                                                                                                                                                                                                                                                                                                                                                                                    |               |              |    |      |    |      |    |      |    |      |    |      |
| -2            | 2200                                                                                                                                                                                                                                                                                                                                                                                                              |               |              |    |      |    |      |    |      |    |      |    |      |                                                                                                                                                                                                                                                                                                                                                                                                                    |               |              |    |      |    |      |    |      |    |      |    |      |
| -1            | 1900                                                                                                                                                                                                                                                                                                                                                                                                              |               |              |    |      |    |      |    |      |    |      |    |      |                                                                                                                                                                                                                                                                                                                                                                                                                    |               |              |    |      |    |      |    |      |    |      |    |      |
| a18           |  <table border="1"><caption>Data for a18 (left column)</caption><thead><tr><th>Concentration</th><th>Fluorescence</th></tr></thead><tbody><tr><td>-5</td><td>3500</td></tr><tr><td>-4</td><td>3200</td></tr><tr><td>-3</td><td>2850</td></tr><tr><td>-2</td><td>2900</td></tr><tr><td>-1</td><td>2400</td></tr></tbody></table> | Concentration | Fluorescence | -5 | 3500 | -4 | 3200 | -3 | 2850 | -2 | 2900 | -1 | 2400 |  <table border="1"><caption>Data for a18 (right column)</caption><thead><tr><th>Concentration</th><th>Fluorescence</th></tr></thead><tbody><tr><td>-5</td><td>1350</td></tr><tr><td>-4</td><td>1300</td></tr><tr><td>-3</td><td>1350</td></tr><tr><td>-2</td><td>1100</td></tr><tr><td>-1</td><td>950</td></tr></tbody></table> | Concentration | Fluorescence | -5 | 1350 | -4 | 1300 | -3 | 1350 | -2 | 1100 | -1 | 950  |
| Concentration | Fluorescence                                                                                                                                                                                                                                                                                                                                                                                                      |               |              |    |      |    |      |    |      |    |      |    |      |                                                                                                                                                                                                                                                                                                                                                                                                                    |               |              |    |      |    |      |    |      |    |      |    |      |
| -5            | 3500                                                                                                                                                                                                                                                                                                                                                                                                              |               |              |    |      |    |      |    |      |    |      |    |      |                                                                                                                                                                                                                                                                                                                                                                                                                    |               |              |    |      |    |      |    |      |    |      |    |      |
| -4            | 3200                                                                                                                                                                                                                                                                                                                                                                                                              |               |              |    |      |    |      |    |      |    |      |    |      |                                                                                                                                                                                                                                                                                                                                                                                                                    |               |              |    |      |    |      |    |      |    |      |    |      |
| -3            | 2850                                                                                                                                                                                                                                                                                                                                                                                                              |               |              |    |      |    |      |    |      |    |      |    |      |                                                                                                                                                                                                                                                                                                                                                                                                                    |               |              |    |      |    |      |    |      |    |      |    |      |
| -2            | 2900                                                                                                                                                                                                                                                                                                                                                                                                              |               |              |    |      |    |      |    |      |    |      |    |      |                                                                                                                                                                                                                                                                                                                                                                                                                    |               |              |    |      |    |      |    |      |    |      |    |      |
| -1            | 2400                                                                                                                                                                                                                                                                                                                                                                                                              |               |              |    |      |    |      |    |      |    |      |    |      |                                                                                                                                                                                                                                                                                                                                                                                                                    |               |              |    |      |    |      |    |      |    |      |    |      |
| Concentration | Fluorescence                                                                                                                                                                                                                                                                                                                                                                                                      |               |              |    |      |    |      |    |      |    |      |    |      |                                                                                                                                                                                                                                                                                                                                                                                                                    |               |              |    |      |    |      |    |      |    |      |    |      |
| -5            | 1350                                                                                                                                                                                                                                                                                                                                                                                                              |               |              |    |      |    |      |    |      |    |      |    |      |                                                                                                                                                                                                                                                                                                                                                                                                                    |               |              |    |      |    |      |    |      |    |      |    |      |
| -4            | 1300                                                                                                                                                                                                                                                                                                                                                                                                              |               |              |    |      |    |      |    |      |    |      |    |      |                                                                                                                                                                                                                                                                                                                                                                                                                    |               |              |    |      |    |      |    |      |    |      |    |      |
| -3            | 1350                                                                                                                                                                                                                                                                                                                                                                                                              |               |              |    |      |    |      |    |      |    |      |    |      |                                                                                                                                                                                                                                                                                                                                                                                                                    |               |              |    |      |    |      |    |      |    |      |    |      |
| -2            | 1100                                                                                                                                                                                                                                                                                                                                                                                                              |               |              |    |      |    |      |    |      |    |      |    |      |                                                                                                                                                                                                                                                                                                                                                                                                                    |               |              |    |      |    |      |    |      |    |      |    |      |
| -1            | 950                                                                                                                                                                                                                                                                                                                                                                                                               |               |              |    |      |    |      |    |      |    |      |    |      |                                                                                                                                                                                                                                                                                                                                                                                                                    |               |              |    |      |    |      |    |      |    |      |    |      |



**Table 3:** IC<sub>50</sub> values of synthesized compounds against AChE and BChE

| Code | AChE | BChE |
|------|------|------|
| a1   |      |      |
| a2   |      |      |
| a3   |      |      |
| a4   |      |      |
| a5   |      |      |

|     |  |  |
|-----|--|--|
| a6  |  |  |
| a7  |  |  |
| a8  |  |  |
| a9  |  |  |
| a10 |  |  |
| a11 |  |  |

|     |  |  |
|-----|--|--|
| a12 |  |  |
| a13 |  |  |
| a14 |  |  |
| a15 |  |  |
| a16 |  |  |

| a17           | 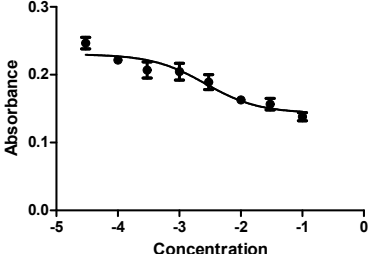 <p>A line graph showing Absorbance on the y-axis (ranging from 0.0 to 0.3) versus Concentration on the x-axis (ranging from -5 to 0). The data points, represented by black squares with vertical error bars, show a decreasing trend from approximately 0.25 at concentration -4.5 to 0.14 at concentration -1. A smooth curve is fitted to the data points.</p> <table border="1"><thead><tr><th>Concentration</th><th>Absorbance</th></tr></thead><tbody><tr><td>-4.5</td><td>0.25</td></tr><tr><td>-4.0</td><td>0.22</td></tr><tr><td>-3.5</td><td>0.20</td></tr><tr><td>-3.0</td><td>0.19</td></tr><tr><td>-2.5</td><td>0.18</td></tr><tr><td>-2.0</td><td>0.16</td></tr><tr><td>-1.5</td><td>0.15</td></tr><tr><td>-1.0</td><td>0.14</td></tr></tbody></table>   | Concentration | Absorbance | -4.5 | 0.25 | -4.0 | 0.22 | -3.5 | 0.20 | -3.0 | 0.19 | -2.5 | 0.18 | -2.0 | 0.16 | -1.5 | 0.15 | -1.0 | 0.14 |                                                                                                                                                                                                                                                                                                                                                                                                                                                                                                                                                                                                                                                                                                                                                                                                                                                         |               |            |      |      |      |      |      |      |      |      |      |      |      |      |      |      |      |      |
|---------------|----------------------------------------------------------------------------------------------------------------------------------------------------------------------------------------------------------------------------------------------------------------------------------------------------------------------------------------------------------------------------------------------------------------------------------------------------------------------------------------------------------------------------------------------------------------------------------------------------------------------------------------------------------------------------------------------------------------------------------------------------------------------------------------------------------------------------------------------------------|---------------|------------|------|------|------|------|------|------|------|------|------|------|------|------|------|------|------|------|---------------------------------------------------------------------------------------------------------------------------------------------------------------------------------------------------------------------------------------------------------------------------------------------------------------------------------------------------------------------------------------------------------------------------------------------------------------------------------------------------------------------------------------------------------------------------------------------------------------------------------------------------------------------------------------------------------------------------------------------------------------------------------------------------------------------------------------------------------|---------------|------------|------|------|------|------|------|------|------|------|------|------|------|------|------|------|------|------|
| Concentration | Absorbance                                                                                                                                                                                                                                                                                                                                                                                                                                                                                                                                                                                                                                                                                                                                                                                                                                               |               |            |      |      |      |      |      |      |      |      |      |      |      |      |      |      |      |      |                                                                                                                                                                                                                                                                                                                                                                                                                                                                                                                                                                                                                                                                                                                                                                                                                                                         |               |            |      |      |      |      |      |      |      |      |      |      |      |      |      |      |      |      |
| -4.5          | 0.25                                                                                                                                                                                                                                                                                                                                                                                                                                                                                                                                                                                                                                                                                                                                                                                                                                                     |               |            |      |      |      |      |      |      |      |      |      |      |      |      |      |      |      |      |                                                                                                                                                                                                                                                                                                                                                                                                                                                                                                                                                                                                                                                                                                                                                                                                                                                         |               |            |      |      |      |      |      |      |      |      |      |      |      |      |      |      |      |      |
| -4.0          | 0.22                                                                                                                                                                                                                                                                                                                                                                                                                                                                                                                                                                                                                                                                                                                                                                                                                                                     |               |            |      |      |      |      |      |      |      |      |      |      |      |      |      |      |      |      |                                                                                                                                                                                                                                                                                                                                                                                                                                                                                                                                                                                                                                                                                                                                                                                                                                                         |               |            |      |      |      |      |      |      |      |      |      |      |      |      |      |      |      |      |
| -3.5          | 0.20                                                                                                                                                                                                                                                                                                                                                                                                                                                                                                                                                                                                                                                                                                                                                                                                                                                     |               |            |      |      |      |      |      |      |      |      |      |      |      |      |      |      |      |      |                                                                                                                                                                                                                                                                                                                                                                                                                                                                                                                                                                                                                                                                                                                                                                                                                                                         |               |            |      |      |      |      |      |      |      |      |      |      |      |      |      |      |      |      |
| -3.0          | 0.19                                                                                                                                                                                                                                                                                                                                                                                                                                                                                                                                                                                                                                                                                                                                                                                                                                                     |               |            |      |      |      |      |      |      |      |      |      |      |      |      |      |      |      |      |                                                                                                                                                                                                                                                                                                                                                                                                                                                                                                                                                                                                                                                                                                                                                                                                                                                         |               |            |      |      |      |      |      |      |      |      |      |      |      |      |      |      |      |      |
| -2.5          | 0.18                                                                                                                                                                                                                                                                                                                                                                                                                                                                                                                                                                                                                                                                                                                                                                                                                                                     |               |            |      |      |      |      |      |      |      |      |      |      |      |      |      |      |      |      |                                                                                                                                                                                                                                                                                                                                                                                                                                                                                                                                                                                                                                                                                                                                                                                                                                                         |               |            |      |      |      |      |      |      |      |      |      |      |      |      |      |      |      |      |
| -2.0          | 0.16                                                                                                                                                                                                                                                                                                                                                                                                                                                                                                                                                                                                                                                                                                                                                                                                                                                     |               |            |      |      |      |      |      |      |      |      |      |      |      |      |      |      |      |      |                                                                                                                                                                                                                                                                                                                                                                                                                                                                                                                                                                                                                                                                                                                                                                                                                                                         |               |            |      |      |      |      |      |      |      |      |      |      |      |      |      |      |      |      |
| -1.5          | 0.15                                                                                                                                                                                                                                                                                                                                                                                                                                                                                                                                                                                                                                                                                                                                                                                                                                                     |               |            |      |      |      |      |      |      |      |      |      |      |      |      |      |      |      |      |                                                                                                                                                                                                                                                                                                                                                                                                                                                                                                                                                                                                                                                                                                                                                                                                                                                         |               |            |      |      |      |      |      |      |      |      |      |      |      |      |      |      |      |      |
| -1.0          | 0.14                                                                                                                                                                                                                                                                                                                                                                                                                                                                                                                                                                                                                                                                                                                                                                                                                                                     |               |            |      |      |      |      |      |      |      |      |      |      |      |      |      |      |      |      |                                                                                                                                                                                                                                                                                                                                                                                                                                                                                                                                                                                                                                                                                                                                                                                                                                                         |               |            |      |      |      |      |      |      |      |      |      |      |      |      |      |      |      |      |
| a18           |  <p>A line graph showing Absorbance on the y-axis (ranging from 0.14 to 0.24) versus Concentration on the x-axis (ranging from -5 to 0). The data points, represented by black squares with vertical error bars, show a decreasing trend from approximately 0.21 at concentration -4.5 to 0.15 at concentration -1. A smooth curve is fitted to the data points.</p> <table border="1"><thead><tr><th>Concentration</th><th>Absorbance</th></tr></thead><tbody><tr><td>-4.5</td><td>0.21</td></tr><tr><td>-4.0</td><td>0.20</td></tr><tr><td>-3.5</td><td>0.19</td></tr><tr><td>-3.0</td><td>0.18</td></tr><tr><td>-2.5</td><td>0.17</td></tr><tr><td>-2.0</td><td>0.17</td></tr><tr><td>-1.5</td><td>0.17</td></tr><tr><td>-1.0</td><td>0.15</td></tr></tbody></table> | Concentration | Absorbance | -4.5 | 0.21 | -4.0 | 0.20 | -3.5 | 0.19 | -3.0 | 0.18 | -2.5 | 0.17 | -2.0 | 0.17 | -1.5 | 0.17 | -1.0 | 0.15 |  <p>A line graph showing Absorbance on the y-axis (ranging from 0.0 to 0.3) versus Concentration on the x-axis (ranging from -5 to 0). The data points, represented by black squares with vertical error bars, show a decreasing trend from approximately 0.25 at concentration -4.5 to 0.14 at concentration -1. A smooth curve is fitted to the data points.</p> <table border="1"><thead><tr><th>Concentration</th><th>Absorbance</th></tr></thead><tbody><tr><td>-4.5</td><td>0.25</td></tr><tr><td>-4.0</td><td>0.22</td></tr><tr><td>-3.5</td><td>0.20</td></tr><tr><td>-3.0</td><td>0.19</td></tr><tr><td>-2.5</td><td>0.18</td></tr><tr><td>-2.0</td><td>0.16</td></tr><tr><td>-1.5</td><td>0.15</td></tr><tr><td>-1.0</td><td>0.14</td></tr></tbody></table> | Concentration | Absorbance | -4.5 | 0.25 | -4.0 | 0.22 | -3.5 | 0.20 | -3.0 | 0.19 | -2.5 | 0.18 | -2.0 | 0.16 | -1.5 | 0.15 | -1.0 | 0.14 |
| Concentration | Absorbance                                                                                                                                                                                                                                                                                                                                                                                                                                                                                                                                                                                                                                                                                                                                                                                                                                               |               |            |      |      |      |      |      |      |      |      |      |      |      |      |      |      |      |      |                                                                                                                                                                                                                                                                                                                                                                                                                                                                                                                                                                                                                                                                                                                                                                                                                                                         |               |            |      |      |      |      |      |      |      |      |      |      |      |      |      |      |      |      |
| -4.5          | 0.21                                                                                                                                                                                                                                                                                                                                                                                                                                                                                                                                                                                                                                                                                                                                                                                                                                                     |               |            |      |      |      |      |      |      |      |      |      |      |      |      |      |      |      |      |                                                                                                                                                                                                                                                                                                                                                                                                                                                                                                                                                                                                                                                                                                                                                                                                                                                         |               |            |      |      |      |      |      |      |      |      |      |      |      |      |      |      |      |      |
| -4.0          | 0.20                                                                                                                                                                                                                                                                                                                                                                                                                                                                                                                                                                                                                                                                                                                                                                                                                                                     |               |            |      |      |      |      |      |      |      |      |      |      |      |      |      |      |      |      |                                                                                                                                                                                                                                                                                                                                                                                                                                                                                                                                                                                                                                                                                                                                                                                                                                                         |               |            |      |      |      |      |      |      |      |      |      |      |      |      |      |      |      |      |
| -3.5          | 0.19                                                                                                                                                                                                                                                                                                                                                                                                                                                                                                                                                                                                                                                                                                                                                                                                                                                     |               |            |      |      |      |      |      |      |      |      |      |      |      |      |      |      |      |      |                                                                                                                                                                                                                                                                                                                                                                                                                                                                                                                                                                                                                                                                                                                                                                                                                                                         |               |            |      |      |      |      |      |      |      |      |      |      |      |      |      |      |      |      |
| -3.0          | 0.18                                                                                                                                                                                                                                                                                                                                                                                                                                                                                                                                                                                                                                                                                                                                                                                                                                                     |               |            |      |      |      |      |      |      |      |      |      |      |      |      |      |      |      |      |                                                                                                                                                                                                                                                                                                                                                                                                                                                                                                                                                                                                                                                                                                                                                                                                                                                         |               |            |      |      |      |      |      |      |      |      |      |      |      |      |      |      |      |      |
| -2.5          | 0.17                                                                                                                                                                                                                                                                                                                                                                                                                                                                                                                                                                                                                                                                                                                                                                                                                                                     |               |            |      |      |      |      |      |      |      |      |      |      |      |      |      |      |      |      |                                                                                                                                                                                                                                                                                                                                                                                                                                                                                                                                                                                                                                                                                                                                                                                                                                                         |               |            |      |      |      |      |      |      |      |      |      |      |      |      |      |      |      |      |
| -2.0          | 0.17                                                                                                                                                                                                                                                                                                                                                                                                                                                                                                                                                                                                                                                                                                                                                                                                                                                     |               |            |      |      |      |      |      |      |      |      |      |      |      |      |      |      |      |      |                                                                                                                                                                                                                                                                                                                                                                                                                                                                                                                                                                                                                                                                                                                                                                                                                                                         |               |            |      |      |      |      |      |      |      |      |      |      |      |      |      |      |      |      |
| -1.5          | 0.17                                                                                                                                                                                                                                                                                                                                                                                                                                                                                                                                                                                                                                                                                                                                                                                                                                                     |               |            |      |      |      |      |      |      |      |      |      |      |      |      |      |      |      |      |                                                                                                                                                                                                                                                                                                                                                                                                                                                                                                                                                                                                                                                                                                                                                                                                                                                         |               |            |      |      |      |      |      |      |      |      |      |      |      |      |      |      |      |      |
| -1.0          | 0.15                                                                                                                                                                                                                                                                                                                                                                                                                                                                                                                                                                                                                                                                                                                                                                                                                                                     |               |            |      |      |      |      |      |      |      |      |      |      |      |      |      |      |      |      |                                                                                                                                                                                                                                                                                                                                                                                                                                                                                                                                                                                                                                                                                                                                                                                                                                                         |               |            |      |      |      |      |      |      |      |      |      |      |      |      |      |      |      |      |
| Concentration | Absorbance                                                                                                                                                                                                                                                                                                                                                                                                                                                                                                                                                                                                                                                                                                                                                                                                                                               |               |            |      |      |      |      |      |      |      |      |      |      |      |      |      |      |      |      |                                                                                                                                                                                                                                                                                                                                                                                                                                                                                                                                                                                                                                                                                                                                                                                                                                                         |               |            |      |      |      |      |      |      |      |      |      |      |      |      |      |      |      |      |
| -4.5          | 0.25                                                                                                                                                                                                                                                                                                                                                                                                                                                                                                                                                                                                                                                                                                                                                                                                                                                     |               |            |      |      |      |      |      |      |      |      |      |      |      |      |      |      |      |      |                                                                                                                                                                                                                                                                                                                                                                                                                                                                                                                                                                                                                                                                                                                                                                                                                                                         |               |            |      |      |      |      |      |      |      |      |      |      |      |      |      |      |      |      |
| -4.0          | 0.22                                                                                                                                                                                                                                                                                                                                                                                                                                                                                                                                                                                                                                                                                                                                                                                                                                                     |               |            |      |      |      |      |      |      |      |      |      |      |      |      |      |      |      |      |                                                                                                                                                                                                                                                                                                                                                                                                                                                                                                                                                                                                                                                                                                                                                                                                                                                         |               |            |      |      |      |      |      |      |      |      |      |      |      |      |      |      |      |      |
| -3.5          | 0.20                                                                                                                                                                                                                                                                                                                                                                                                                                                                                                                                                                                                                                                                                                                                                                                                                                                     |               |            |      |      |      |      |      |      |      |      |      |      |      |      |      |      |      |      |                                                                                                                                                                                                                                                                                                                                                                                                                                                                                                                                                                                                                                                                                                                                                                                                                                                         |               |            |      |      |      |      |      |      |      |      |      |      |      |      |      |      |      |      |
| -3.0          | 0.19                                                                                                                                                                                                                                                                                                                                                                                                                                                                                                                                                                                                                                                                                                                                                                                                                                                     |               |            |      |      |      |      |      |      |      |      |      |      |      |      |      |      |      |      |                                                                                                                                                                                                                                                                                                                                                                                                                                                                                                                                                                                                                                                                                                                                                                                                                                                         |               |            |      |      |      |      |      |      |      |      |      |      |      |      |      |      |      |      |
| -2.5          | 0.18                                                                                                                                                                                                                                                                                                                                                                                                                                                                                                                                                                                                                                                                                                                                                                                                                                                     |               |            |      |      |      |      |      |      |      |      |      |      |      |      |      |      |      |      |                                                                                                                                                                                                                                                                                                                                                                                                                                                                                                                                                                                                                                                                                                                                                                                                                                                         |               |            |      |      |      |      |      |      |      |      |      |      |      |      |      |      |      |      |
| -2.0          | 0.16                                                                                                                                                                                                                                                                                                                                                                                                                                                                                                                                                                                                                                                                                                                                                                                                                                                     |               |            |      |      |      |      |      |      |      |      |      |      |      |      |      |      |      |      |                                                                                                                                                                                                                                                                                                                                                                                                                                                                                                                                                                                                                                                                                                                                                                                                                                                         |               |            |      |      |      |      |      |      |      |      |      |      |      |      |      |      |      |      |
| -1.5          | 0.15                                                                                                                                                                                                                                                                                                                                                                                                                                                                                                                                                                                                                                                                                                                                                                                                                                                     |               |            |      |      |      |      |      |      |      |      |      |      |      |      |      |      |      |      |                                                                                                                                                                                                                                                                                                                                                                                                                                                                                                                                                                                                                                                                                                                                                                                                                                                         |               |            |      |      |      |      |      |      |      |      |      |      |      |      |      |      |      |      |
| -1.0          | 0.14                                                                                                                                                                                                                                                                                                                                                                                                                                                                                                                                                                                                                                                                                                                                                                                                                                                     |               |            |      |      |      |      |      |      |      |      |      |      |      |      |      |      |      |      |                                                                                                                                                                                                                                                                                                                                                                                                                                                                                                                                                                                                                                                                                                                                                                                                                                                         |               |            |      |      |      |      |      |      |      |      |      |      |      |      |      |      |      |      |

## 2D interaction of potent compounds

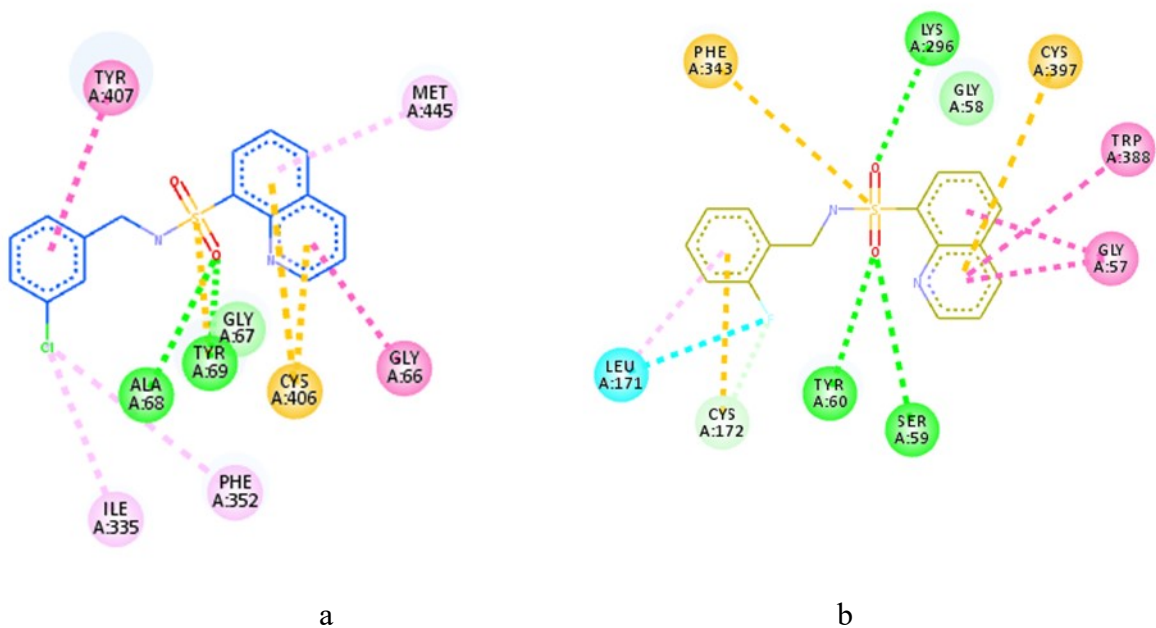

**Figure 54:** 2D interaction of compound **a5** left side MAO-A (a) and **a12** right side MAO-B (b)

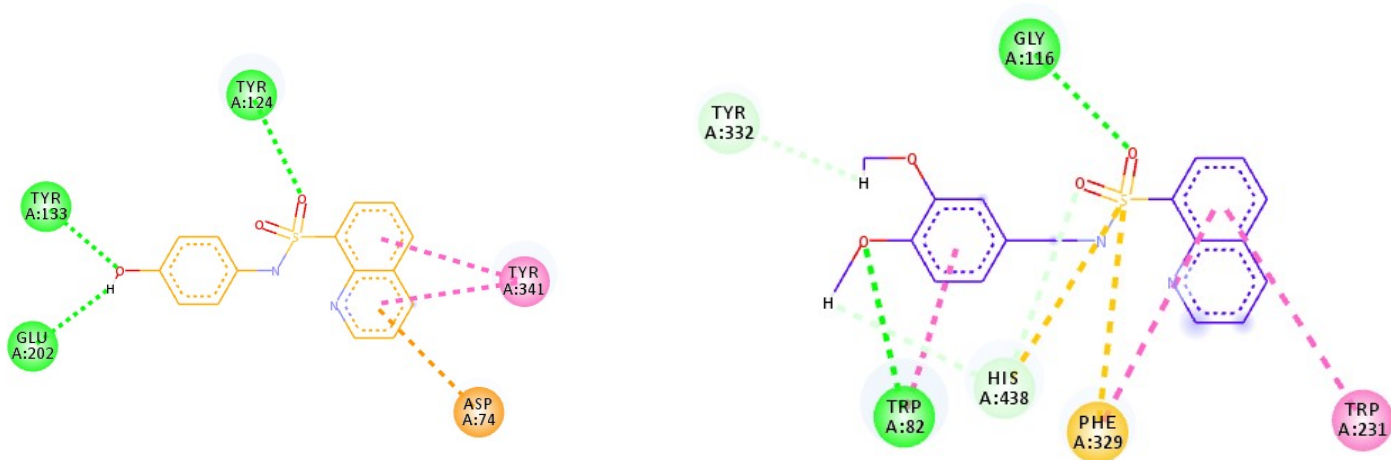

**Figure 55:** 2D interaction of compound **a11** left side AChE (c) and **a6** right side BChE (d)
